# Supplementary material
Source: PubMed Central journal article supplement (PMC2277516)

## Supporting Information

### A Phosphorylated Prodrug for the Inhibition of Pin1

Song Zhao, Felicia A. Etzkorn\*

*Department of Chemistry, Virginia Tech, Blacksburg, VA, 24061-0212.*

Correspondence: fetzkorn@vt.edu

## Experimental

### General

Unless otherwise indicated, all reactions were carried out under N<sub>2</sub> in flame-dried glassware. THF and CH<sub>2</sub>Cl<sub>2</sub> were dried by passage through alumina. Anhydrous (99.8%) DMF was available commercially and used directly from SureSeal™ bottles. Dimethyl sulfoxide (DMSO) was anhydrous and dried with 4 Å molecular sieves. Triethylamine (TEA) was distilled from CaH<sub>2</sub>, and oxalyl chloride (COCl)<sub>2</sub> was distilled before use each time. Diisopropylethylamine (DIEA) was distilled from CaH<sub>2</sub> under a N<sub>2</sub> atmosphere. Brine, NaHCO<sub>3</sub>, and NH<sub>4</sub>Cl refer to saturated aqueous solutions unless otherwise noted. Flash chromatography was performed on 32-63 μm or 230-400 mesh, ASTM silica gel with reagent grade solvents. NMR spectra were obtained at rt in CDCl<sub>3</sub> unless otherwise noted. Proton (400 MHz) NMR spectra were obtained for compounds **4-10**, and carbon-13 (75 MHz) NMR spectra for compounds **4-10**. Proton (500 MHz) NMR spectra, and carbon-13 (125 MHz) NMR spectra were obtained for compounds **1** and **2**. Phosphorus (75 MHz) NMR spectra was obtained for compound **1**, **2**, **10**. Rotamer peaks are indicated by listing <sup>1</sup>H chemical shifts separately; for <sup>13</sup>C the minor rotamer peak is listed in parentheses. Coupling constant *J* values are given in Hz. Electrospray ionization (ESI-MS) was carried out on a triple quadrupole ThermoFinnigan TSQ MS. Human Pin1 recombinant protein was prepared as described.<sup>1</sup> Analytical reverse phase liquid chromatography (RP-HPLC) was performed on a RP C18, 250 × 4.4 mm, 5 μm column (Varian Solaris). Preparative HPLC was performed using on a RP C18, 250 × 21.4 mm, 5 μm (Varian Solaris). HPLC solvents were A: water, B: CH<sub>3</sub>CN. UV detection was performed at 220 nm unless otherwise noted.

**Lactone 4.** Fmoc-Ser-Ψ[(*Z*)CH=C]-Pro-OH, **3** (40 mg, 0.096 mmol) and imidazole (33 mg, 0.48 mmol) were dissolved in DMF (2.0 mL), and TBSCl (29 mg, 0.19 mmol) was added. The mixture was stirred for 16 h, and NH<sub>4</sub>Cl (2 mL) was added. The mixture was stirred for an additional 50 min, and diluted with EtOAc (20 mL), washed with NH<sub>4</sub>Cl (2 × 10 mL), dried with Na<sub>2</sub>SO<sub>4</sub>, and concentrated. Chromatography on silica gel with 2% methanol in chloroform gave **4** (28 mg, 55%) as white powder. <sup>1</sup>H NMR (CDCl<sub>3</sub>) δ 7.77 (d, *J* = 8.0, 2H),

7.57 (d,  $J = 8.0$ , 2H), 7.40 (app. t,  $J = 7.5$ , 2H), 7.32 (app. t,  $J = 6.5$ , 2H), 5.50 (br s, 1H), 4.73 (d,  $J = 8.5$ , 1H), 4.52? (br s, 1H), 4.46 (d,  $J = 6.0$ , 2H), 4.39 (t,  $J = 12$ , 1H), 4.22 (m, 2H), 3.92 (m, 1H), 2.37 (br s, 2H), 2.27 (two d,  $J = 7.1, 7.7$ , 1H), 1.97 (two d,  $J = 6.0, 7.1$ , 1H), 1.73 (two d,  $J = 6.0, 6.1$ , 1H), 1.60 (two d,  $J = 5.9, 7.8$ , 1H).  $^{13}\text{C-NMR}$  ( $\text{CDCl}_3$ )  $\delta$  173.2, 155.3, 143.6, 142.4, 141.3, 127.8, 127.0, 124.9, 120.0, 66.7, 66.3, 49.0, 47.1, 43.9, 35.1, 29.3, 24.4 ppm. HRMS calculated for  $\text{C}_{24}\text{H}_{23}\text{NO}_4$  ( $\text{MH}^+$ )  $m/z = 390.1705$ , found  $m/z = 390.1715$ .

**Boc-Ser(TBS)- $\Psi$ [(Z)CH=C]-Pro-OH 7.** Boc-Ser- $\Psi$ [(Z)CH=C]-Pro-OH **6** (synthesized by the published method)<sup>2</sup> (111 mg, 0.388 mmol) and imidazole (136 mg, 2.00 mmol) were dissolved in DMF (2.0 mL), and TBSCl (151 mg, 1.00 mmol) was added with stirring. The reaction was stirred for 18 h at rt, then  $\text{NH}_4\text{Cl}$  (5 mL) was added. The mixture was stirred for an additional 60 min, and then diluted with EtOAc (20 mL), washed with  $\text{NH}_4\text{Cl}$  ( $2 \times 10$  mL), and brine (10 mL). The organic layer was dried over  $\text{MgSO}_4$ , and concentrated by rotary evaporation. Chromatography on silica gel with 30% EtOAc in hexane gave 150 mg (70%) of **7** as pale yellowish oil.  $^1\text{H-NMR}$  ( $\text{CDCl}_3$ )  $\delta$  11.10 (br s, 1H), 5.96 and 4.91 (br s, 1 H), 5.42 (d,  $J = 5.8$ , 1H), 4.23 (br s, 1H), 3.61 and 3.59 (d,  $J = 4.4$ , 1H), 3.55 and 3.48 (br s, 2H), 2.41 (m, 1H), 2.23 (m, 1H), 2.04 (br s, 1H), 1.90 (m, 1H), 1.80 (br s, 1H), 1.55 (m, 1H), 1.37 (s, 9H), 0.83 (s, 9H), - 0.01 (s, 6H).  $^{13}\text{C-NMR}$  ( $\text{CDCl}_3$ )  $\delta$  178.5, 155.4 (157.0), 144.1 (145.4), 122.2, 79.1 (79.9), 65.3, 51.8 (52.7), 45.8, 33.6, 31.1, 28.2, 25.7, 24.0, 18.2, -5.5 ppm. HRMS calculated for  $\text{C}_{20}\text{H}_{38}\text{NO}_5\text{Si}$  ( $\text{MH}^+$ )  $m/z = 400.2519$ , found  $m/z = 400.2485$ .

**Boc-Ser(TBS)- $\Psi$ [(Z)CH=C]-Pro-(2)-N-(3)-ethylaminoindole 8.** Boc-Ser(TBS)- $\Psi$ [(Z)CH=C]-Pro-OH, **7** (150 mg, 0.376 mmol) was dissolved in DMF (20 mL), and cooled to 0 °C for 10 min. HOAt (101 mg, 0.751 mmol), HATU (287 mg, 0.751 mmol) and DMAP (10 mg, 0.075 mmol) were added. Then DIEA (260  $\mu\text{L}$ , 1.50 mmol) was added to the stirred solution dropwise. Tryptamine (120 mg, 0.751 mmol) was added slowly. The mixture was stirred for 6 h, diluted with EtOAc (200 mL), washed with water ( $2 \times 50$  mL), and brine (20 mL). The aqueous layer was back-extracted with  $\text{CH}_2\text{Cl}_2$  ( $2 \times 75$  mL). The organic layers were combined, dried with  $\text{Na}_2\text{SO}_4$  and concentrated. Chromatography on silica gel with 2% MeOH in  $\text{CHCl}_3$  gave 184 mg (90%) of **8** as colorless oil.  $^1\text{H-NMR}$  ( $\text{CDCl}_3$ )  $\delta$  8.82 (br s, 1H), 7.71 (br s, 1H), 7.65 (d,  $J = 7.6$ , 1H), 7.33 (d,  $J = 8.1$ , 1H), 7.13 (app t,  $J = 7.6$ , 1H), 7.05 (app t,  $J = 7.5$ , 1H), 6.97 (s, 1H), 5.32 (d,  $J = 8.8$ , 1H), 5.05 (s, 1H), 4.08 (m, 1H), 3.64 (m, 1H), 3.55 (m, 1H), 3.50 (two d,  $J = 6.2, 6.3$ , 2H), 3.35 (d,  $J = 7.0$ , 1H), 3.00 (app t,  $J = 7.7$ , 2H), 2.31 (m, 2H), 2.15 (m, 1H), 1.79 (m, 1H), 1.54 (m, 2H), 1.44 (s, 9H), 0.88 (s, 9H), 0.04 (s, 6H).  $^{13}\text{C-NMR}$  ( $\text{CDCl}_3$ )  $\delta$  171.9, 156.0, 144.3, 136.2, 127.5, 123.8, 121.9, 121.4, 118.7,

113.1, 111.1, 79.5, 64.9, 52.6, 47.5, 40.5, 38.5, 36.4, 32.8, 30.8, 28.3, 25.7, 25.0, 23.3, 18.2, -5.6. HRMS calculated for  $C_{30}H_{48}N_3O_4$  ( $MH^+$ )  $m/z = 542.3414$ , found  $m/z = 542.3403$ .

**Boc-Ser- $\Psi$ [(Z)CH=C]-Pro-(2)-N-(3) ethylaminoindole 9.** Boc-Ser(TBS)- $\Psi$ [(Z)CH=C]-Pro-(2)-N-(3) ethylaminoindole, **8** (92 mg, 0.17 mmol) was dissolved in THF (2.5 mL), and cooled to 0 °C for 10 min. A solution of TBAF (117 mg, 0.342 mmol) in THF (2.5 mL) was added dropwise at 0 °C. The mixture was stirred at rt for 4 h. The reaction was quenched with  $NH_4Cl$  (25 mL), and extracted with EtOAc (2 × 80 mL). The organic layer was washed with brine (20 mL), dried with  $Na_2SO_4$  and concentrated. Chromatography on silica gel with 2% MeOH in  $CHCl_3$  gave 85 mg (85%) of **9** as colorless oil.  $^1H$ -NMR ( $CDCl_3$ ),  $\delta$  8.60 (br s, 1H), 7.73 (br s, 1H), 7.63 (d,  $J = 7.8$ , 1H), 7.33 (d,  $J = 8.1$ , 1H), 7.15 (app t,  $J = 7.5$ , 1H), 7.07 (app t,  $J = 7.4$ , 1H), 6.99 (s, 1H), 5.33 (s, 1H), 5.30 (d,  $J = 8.8$ , 1H), 4.04 (m, 1H), 3.87 (br s, 1H), 3.60 (m, 1H), 3.53 (m, 2H), 3.45 (m, 1H), 3.34 (d,  $J = 7.6$ , 1H), 3.01 (m, 2H), 2.29 (m, 1H), 2.17 (m, 2H), 1.80 (m, 1H), 1.52 (m, 2H), 1.41 (s, 9H).  $^{13}C$ -NMR ( $CDCl_3$ )  $\delta$  173.5, 156.5, 144.4, 136.1, 127.5, 123.4, 122.1, 121.7, 119.1, 118.8, 113.1, 111.1, 79.7, 64.7, 53.4, 47.4, 40.5, 33.4, 31.6, 28.3, 24.7, 23.8. HRMS calculated for  $C_{24}H_{34}N_3O_4$  ( $MH^+$ )  $m/z = 428.2549$ , found  $m/z = 428.2553$ .

**Fmoc-Ser- $\Psi$ [(Z)CH=C]-Pro-(2)-N-(3)-ethylaminoindole 5.** Boc-Ser- $\Psi$ [(Z)CH=C]-Pro-(2)-N-(3)-ethylaminoindole **9** (62 mg, 0.14 mmol) was dissolved in  $CH_2Cl_2$  (3 mL), and cooled to 0 °C for 10 min. TFA (1 mL) was added dropwise. The mixture was stirred at 0 °C for 10 min and cold bath was removed. The mixture was stirred at rt for an additional 45 min and the solvent was evaporated.  $CH_2Cl_2$  was added and evaporated (3 × 20 mL). The remaining TFA was removed under high vacuum overnight. Without further purification, the crude product was dissolved in a mixture solution of 10% aq.  $Na_2CO_3$  and  $NaHCO_3$  (3:1, 2 mL), then cooled to 0 °C for 10 min. A solution of Fmoc-Cl (43 mg, 0.17 mmol) in dioxane (2 mL) was added dropwise. After stirring at 0 °C for 20 h, the mixture was diluted with water (20 mL) and extracted with EtOAc (2 × 25 mL). The aqueous layer was acidified with 1M HCl to pH 3-4 and extracted with EtOAc (3 × 30 mL) and  $CH_2Cl_2$  (3 × 30 mL). The organic layers were combined, washed with brine (20 mL), dried with  $Na_2SO_4$ , and concentrated. Chromatography on silica gel with 10 % MeOH in  $CHCl_3$  gave 63 mg (78 %) of **5** as a colorless oil.  $^1H$ -NMR ( $CDCl_3$ ),  $\delta$  7.95 (br s, 1H), 7.77 (d,  $J = 7.5$ , 2H), 7.57 (d,  $J = 7.8$ , 2H), 7.53 (d,  $J = 6.2$ , 2H), 7.41 (app t,  $J = 7.5$ , 2H), 7.32 (app t,  $J = 6.8$ , 2H), 7.24 (s, 1H), 7.10 (app t,  $J = 7.5$ , 1H), 6.97 (app t,  $J = 7.4$ , 1H), 6.83 (br s, 1H), 5.23 (m, 2H), 4.37 (dd,  $J = 6.9$ , 10.5, 1H), 4.26 (d,  $J = 7.0$ , 9.3, 1H), 4.15 (app t,  $J = 6.6$ , 1H), 3.83 (m, 1H), 3.5-3.37 (m, 4H),

3.23 (d,  $J = 6.8$ , 1H), 3.00 (m, 1H), 2.86 (m, 1H), 2.32 (m, 1H), 2.19 (m, 2H), 1.84 (m, 1H), 1.54 (m, 2H).  $^{13}\text{C}$ -NMR ( $\text{CDCl}_3$ )  $\delta$  172.9, 156.7, 145.5, 143.9, 141.4, 136.2, 127.9, 127.3, 125.2, 125.1, 122.6, 122.2, 121.8, 120.2, 119.3, 118.9, 113.4, 111.2, 66.7, 64.6, 53.7, 47.9, 47.2, 40.7, 33.6, 31.7, 24.6, 24.0. HRMS calculated for  $\text{C}_{34}\text{H}_{36}\text{N}_3\text{O}_4$  ( $\text{MH}^+$ )  $m/z = 550.2706$ , found  $m/z = 550.2711$ .

**Fmoc-Ser(PO(OH)<sub>2</sub>)-Ψ[(Z)CH=C]-Pro-(2)-N-(3)-ethylaminoindole 1.** Fmoc-Ser-Ψ[(Z)CH=C]-Pro-(2)-N-(3)-ethylaminoindole, **5** (31 mg, 0.056 mmol) was dissolved in THF (3 mL). Tetrazole (36 mg, 0.22 mmol) and (*t*BuO)<sub>2</sub>P(N-*i*Pr)<sub>2</sub> (40 μL, 0.11 mmol) were added. The mixture was stirred at rt for 20 h, then cooled to  $-40\text{ }^\circ\text{C}$  for 10 min. *tert*-Butyl hydroperoxide (5 M in decane, 22 μL, 0.11 mmol) was added dropwise. The mixture was stirred at  $-40\text{ }^\circ\text{C}$  for 40 min. The cold bath was removed and the reaction was stirred at rt for an additional 30 min. The mixture was cooled to  $0\text{ }^\circ\text{C}$  and 10% aq.  $\text{Na}_2\text{S}_2\text{O}_3$  (3 mL) was added. After stirring for 10 min, the mixture was transferred to a separatory funnel using  $\text{Et}_2\text{O}$  ( $3 \times 30\text{ mL}$ ). The combined organic layers were washed with 10% aq.  $\text{Na}_2\text{S}_2\text{O}_3$  ( $2 \times 20\text{ mL}$ ) and brine (20 mL), dried with  $\text{Na}_2\text{SO}_4$ , and concentrated to give 40 mg of the crude Fmoc-Ser(PO(O-*t*Bu)<sub>2</sub>)-Ψ[(Z)CH=C]-Pro-(2)-N-(3)-ethylaminoindole, **10**, as a colorless oil.  $^1\text{H}$ -NMR ( $\text{CDCl}_3$ ),  $\delta$  8.30 (s, 1H), 7.70 (t,  $J = 10$ , 2H), 7.50-7.40 (m, 3H), 7.35 (m, 2H), 7.25 (m, 3H), 7.06 (app t,  $J = 7.5$ , 1H), 6.92 (m, 2H), 5.67 (m, 1H), 5.30 (m, 1H), 4.27 (d,  $J = 9.0$ , 1H), 4.10 (m, 2H), 3.90 (m, 2H), 3.50 (m, 3H), 3.35 (m, 1H), 2.95 (m, 2H), 2.22 (m, 3H), 1.90 (m, 1H), 1.45 (s, 9H).  $^{31}\text{P}$ -NMR ( $\text{CDCl}_3$ )  $\delta$   $-9.65$  (s). ESI-MS gave the molecular ion  $[\text{M}+\text{H}]^+$   $m/z = 742.3$ ,  $[\text{M}+\text{Na}]^+$   $m/z = 764.3$ . Without further purification (decomposes on silica gel), Fmoc-Ser(PO(O-*t*Bu)<sub>2</sub>)-Ψ[(Z)CH=C]-Pro-(2)-N-(3)-ethylaminoindole (40 mg, 0.054 mmol) was dissolved in  $\text{CH}_2\text{Cl}_2$  (4 mL), and cooled to  $0\text{ }^\circ\text{C}$ . TFA (1 mL) was added to the reaction mixture slowly, followed by the addition of water (0.2 mL) as scavenger. After stirring at  $0\text{ }^\circ\text{C}$  for 10 min, the cold bath was removed and the reaction mixture was stirred at rt for an additional 30 min, and the solvent was evaporated.  $\text{CH}_2\text{Cl}_2$  was added and evaporated ( $5 \times 20\text{ mL}$ ). The remaining TFA was removed under high vacuum overnight until constant weight was obtained. The crude product was purified by semipreparative  $\text{C}_{18}$  HPLC at 15 mL/min, 10% to 90% B over 20 min. Purified **1** (12 mg, 70% yield) eluted at 19.6 min as a white solid. Purity was 98.8% by analytical  $\text{C}_{18}$  HPLC (2 mL/min, 10% to 90% B over 13 min, retention time 11.79 min).  $^1\text{H}$ -NMR ( $\text{CD}_3\text{OD}$ ),  $\delta$  7.73 (dd,  $J = 7.4, 5.1$ , 2H), 7.55 (app t,  $J = 7.9$ , 2H), 7.39 (d,  $J = 7.3$ , 1H), 7.32 (m, 3H), 7.21 (dd,  $J = 7.0, 13.4$ , 2H), 7.03 (app t,  $J = 7.3$ , 1H), 6.97 (s, 1H), 6.90 (app t,  $J = 7.7$ , 1H), 5.43 (d,  $J = 9.3$ , 1H), 4.40 (m, 1H),

4.24 (m, 2H), 4.08 (app t,  $J = 6.6$ , 1H), 3.91 (m, 1H), 3.86 (m, 1H), 3.47 (m, 1H), 3.41 (app t,  $J = 7.6$ , 2H), 2.91 (m, 2H), 2.41 (m, 1H), 2.30 (m, 1H), 1.99 (m, 2H), 1.72 (m, 1H), 1.57 (m, 1H).  $^{13}\text{C}$ -NMR ( $\text{CD}_3\text{OD}$ )  $\delta$  147.3, 145.4, 145.2, 142.5, 138.1, 128.8, 128.7, 128.1, 126.3, 126.2, 125.0, 123.4, 122.3, 120.8, 119.5, 119.4, 113.3, 112.2, 68.1, 67.9, 52.7, 41.7, 35.2, 35.1, 33.1, 30.8, 26.0, 25.5.  $^{31}\text{P}$ -NMR ( $\text{CD}_3\text{OD}$ )  $\delta$   $-1.16$  (s). ESI-MS  $[\text{M}+\text{H}]^+$   $m/z = 630.3$ ,  $[\text{M}+\text{Na}]^+$   $m/z = 652.2$ ,  $[\text{M}-\text{H}_3\text{PO}_4]^+$   $m/z = 532.2$ . HRMS calcd for  $\text{C}_{34}\text{H}_{37}\text{N}_3\text{O}_7\text{P}$  ( $\text{MH}^+$ )  $m/z = 630.2369$ , found  $m/z = 630.2340$ .

**Fmoc-Ser(PO(OPOM) $_2$ )- $\Psi$ [(Z)CH=C]-Pro-(2)-N-(3)-ethylaminoindole 2.** BisPOM phosphate was synthesized by a modification of the published procedure.<sup>3</sup> Oxalyl chloride (90  $\mu\text{L}$ , 1.9 mmol) was added dropwise to  $\text{CH}_2\text{Cl}_2$  (1.5 mL) at 0  $^\circ\text{C}$ . DMF (7  $\mu\text{L}$ ) was added in one portion. A solution of hydrogen bisPOM phosphate (62 mg, 0.19 mmol) in  $\text{CH}_2\text{Cl}_2$  (1.5 mL) was added dropwise at 0  $^\circ\text{C}$  over 15 min. The reaction mixture was stirred at rt for 2 h. The solvent and  $(\text{COCl})_2$  were removed by rotary evaporation. The remaining oxalyl chloride was removed in vacuo until constant weight was obtained. The product was obtained as slightly yellowish oil (50 mg, 80%). Without further purification, the bisPOMphosphoryl chloride was used immediately in the next step.  $^1\text{H}$ -NMR ( $\text{CDCl}_3$ )  $\delta$  5.71 (m, 4H), 1.23 (s, 18H).  $^{13}\text{C}$ -NMR ( $\text{CDCl}_3$ )  $\delta$  83.52, 83.45, 31.0, 27.0.  $^{31}\text{P}$ -NMR ( $\text{CDCl}_3$ ),  $\delta$  3.80 (s). Fmoc-Ser- $\Psi$ [(Z)CH=C]-Pro-(2)-N-(3)-ethylaminoindole, **5** (21 mg, 0.038 mmol) was dissolved in THF (1.5 mL) and cooled to  $-40$   $^\circ\text{C}$ . Pyridine (0.75 mL) was added, and the mixture was stirred at  $-40$   $^\circ\text{C}$  for 20 min. DMAP (2.5 mg) was added, then a solution of bisPOM phosphoryl chloride (50 mg, 0.14 mmol) in THF (0.9 mL) was added to the reaction mixture dropwise via syringe at  $-40$   $^\circ\text{C}$ . The mixture was stirred at  $-40$   $^\circ\text{C}$  for 2 h. A second batch of bisPOM phosphoryl chloride solution, (20 mg, 0.058 mmol) in THF (0.5 mL) was added. The mixture was stirred for 30 min. The cold bath was removed and the reaction mixture was stirred at rt for 6 h. Water (2 mL) was added to quench the reaction and the reaction mixture was diluted with EtOAc (40 mL). The organic layer was washed with water ( $2 \times 20$  mL). The aqueous layer was back-extracted with EtOAc ( $3 \times 20$  mL). The combined organic layers were washed with brine (20 mL), dried with  $\text{Na}_2\text{SO}_4$ , and concentrated. The crude product was purified using semipreparative  $\text{C}_{18}$  HPLC (15 mL/min, 60% B for 5 min, then 60% to 95% B over 20 min). Purified **2** (3 mg, 20% yield) eluted at 23.0 min as a white solid. Purity > 95% by analytical  $\text{C}_{18}$  HPLC (1.5 mL/min, 10% B for 5 min, then 10% to 90% B over 20 min, retention time 24.7 min).  $^1\text{H}$ -NMR ( $\text{CDCl}_3$ ),  $\delta$  8.04 (s, 1H), 7.76 (d,  $J = 7.1$ , 2H), 7.55 (m, 3H), 7.40 (m, 2H), 7.30 (m, 2H), 7.10 (app t,  $J = 8.1$ , 1H), 6.97 (app t,  $J = 7.4$ , 2H), 6.88 (s,

1H), 5.62 (m, 4H), 5.42(br s, 1H), 5.25 (m, 2H), 4.29 (d,  $J = 7.0$ , 1H), 4.16 (app t,  $J = 6.4$ , 1H), 4.11 (br s, 1H), 3.98 (m, 1H), 3.49 (m, 2H), 3.45-3.25 (m, 2H), 2.93 (m, 2H), 2.4-2.0 (m, 4H), 1.83 (m, 1H), 1.25 (s, 9H), 1.23 (s, 9H).  $^{13}\text{C-NMR}$  ( $\text{CDCl}_3$ )  $\delta$  177.2, 172.6, 156.1, 148.0, 144.0, 141.4, 136.3, 127.9, 127.3, 125.2, 122.2, 122.1, 120.3, 120.1, 119.4, 118.9, 113.4, 111.3, 83.0, 69.0, 67.0, 51.3, 48.0, 47.2, 40.4, 38.9, 33.6, 31.6, 27.0, 24.7, 23.9.  $^{31}\text{P-NMR}$  ( $\text{CDCl}_3$ )  $\delta$  -3.93 (s). ESI-MS gave the molecular ion  $[\text{M}+\text{H}]^+$   $m/z = 858.25$ ;  $[\text{M}+\text{Na}]^+$   $m/z = 880.37$ ;  $[\text{M}+\text{K}]^+$   $m/z = 896.47$ . HRMS calculated for  $\text{C}_{46}\text{H}_{57}\text{N}_3\text{O}_{11}\text{P}$  ( $\text{MH}^+$ )  $m/z = 858.3731$ , found  $m/z = 858.3805$ .

### Pin1 inhibition assay

Pin1 inhibition assay of **1** was performed as published.<sup>1</sup> The inhibitor **1** (10  $\mu\text{L}$  at concentrations of 800  $\mu\text{M}$ , 1.6, 2.4, 3.2, 4.0, 6.0, 8.0, 10.0 mM in 1:2 DMSO:  $\text{H}_2\text{O}$ ) was pre-equilibrated in the 1.0 mL quartz cuvette at 4  $^\circ\text{C}$  for 10 min. For each concentration, the assay was performed in duplicate, and all of the data were used for calculation of  $\text{IC}_{50}$ . The plot of % inhibition vs.  $\log[\text{I}]$  ( $\mu\text{M}$ ) produced a sigmoidal curve (SI Figure 1). The concentration of **1** for 50% inhibition of Pin1 activity ( $\text{IC}_{50}$ ) was obtained by fitting all the experimental data to a dose response curve (95% confidence level) using equation (1) in TableCurve (version 3 for win32), where  $[\text{I}]$  is the inhibitor concentration ( $\mu\text{M}$ ).

$$\%Inhibition = a + \frac{b}{\{1 + (\log[I]/c)^d\}} \quad (1)$$

### A2780 cell based assay

Antiproliferative activity towards the A2780 human ovarian cancer cell line was measured as published.<sup>4,5</sup> The concentrations of **1** used were 190.8, 159.0, 95.4, 79.5, 39.7, 19.9, 9.9  $\mu\text{M}$  (duplicates), and the concentrations of **2** were 140.0, 116.7, 58.3, 29.2, 14.6, 7.3, 5.8  $\mu\text{M}$  (duplicates). The plot of % inhibition of proliferation activity against A2780 ovarian cancer cells vs.  $\log[\text{I}]$  ( $\mu\text{M}$ ) produced a sigmoidal curve for each inhibitor (SI Figures 2 and 3). The concentrations of **1** and **2** for 50% inhibition of Pin1 activity ( $\text{IC}_{50}$ ) were obtained by fitting all the experimental data to a dose response curve (95% confidence level) using equation (1) in TableCurve (version 3 for win32). Where  $[\text{I}]$  is the inhibitor concentration ( $\mu\text{M}$ ).

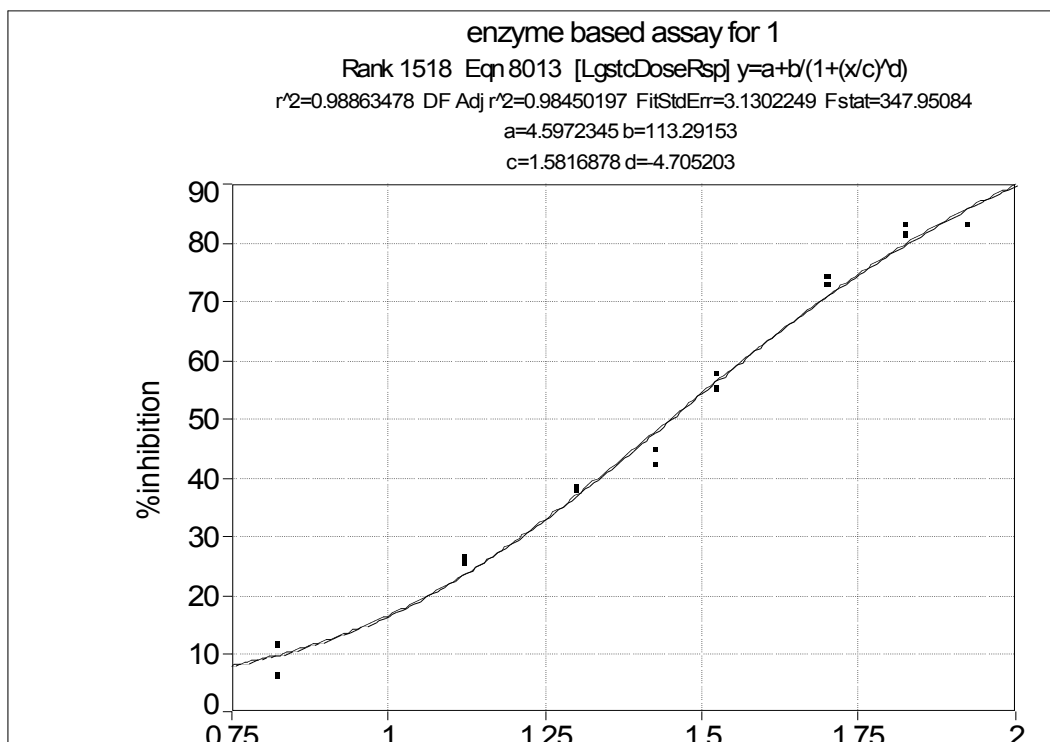

**SI Figure 1.** Dose response curve for inhibition of Pin1 by compound **1** ( $IC_{50} = 28.3 \pm 2.1 \mu\text{M}$ ). In the equation,  $a = 4.60$ ,  $b = 113.29$ ,  $c = 1.58$ , and  $d = 4.71$ ;  $r^2 = 0.989$ .  $IC_{50} = 28.3 \pm 2.1 \mu\text{M}$ .

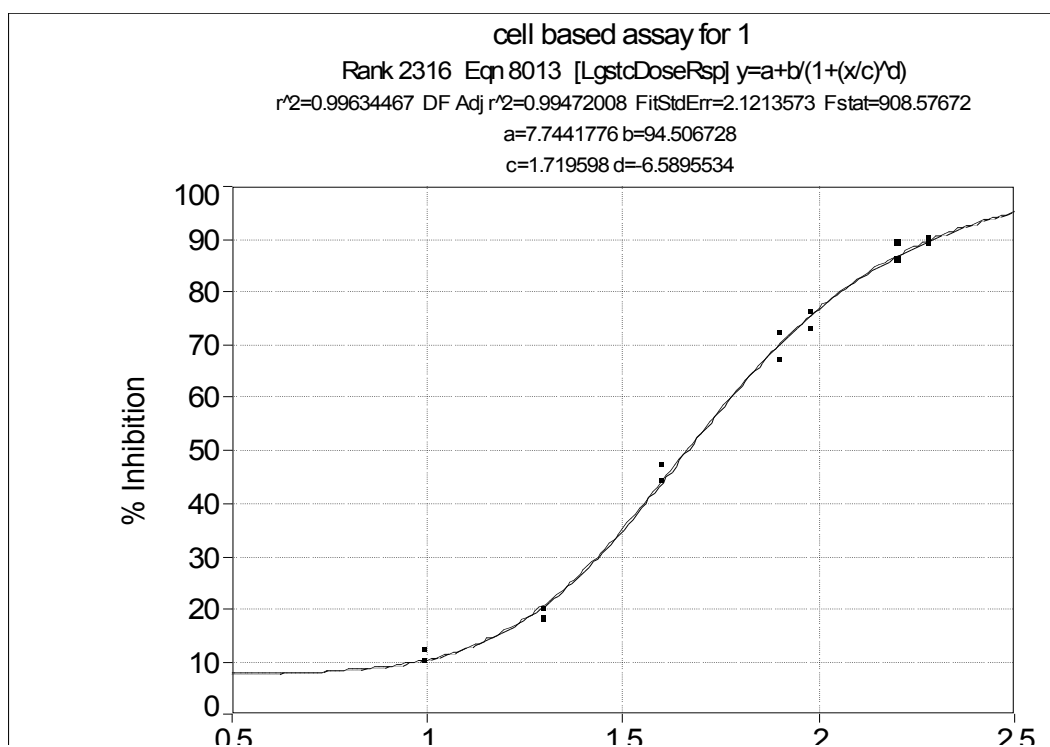

**SI Figure 2.** Dose response curve for the inhibition of A2780 ovarian cancer cells proliferation activity of **1**. For **1**, from equation (1),  $a = 7.74$ ,  $b = 94.51$ ,  $c = 1.72$ , and  $d = 6.59$ ;  $r^2 = 0.996$ .  $IC_{50} = 46.2 \pm 3.0 \mu\text{M}$ .

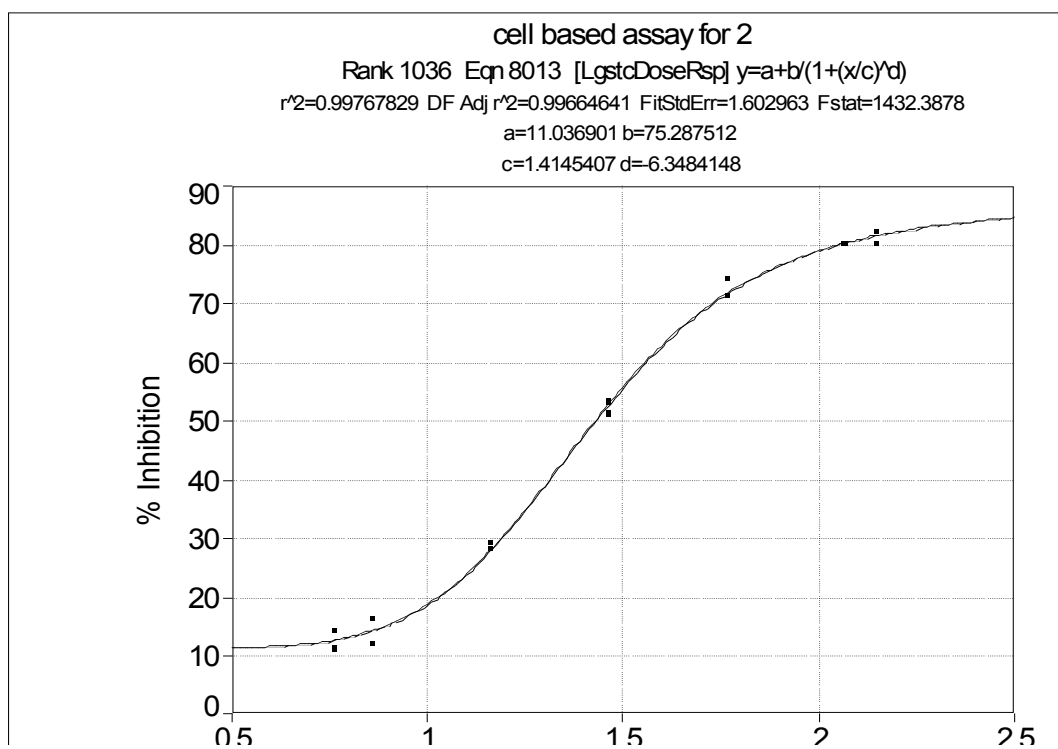

**SI Figure 3.** Dose response curve for the inhibition of A2780 ovarian cancer cells proliferation activity of **2**. For **2**, from the equation,  $a = 11.04$ ,  $b = 75.29$ ,  $c = 1.41$ , and  $d = 6.35$ ;  $r^2 = 0.998$ .  $IC_{50} = 26.9 \pm 1.5 \mu\text{M}$ .

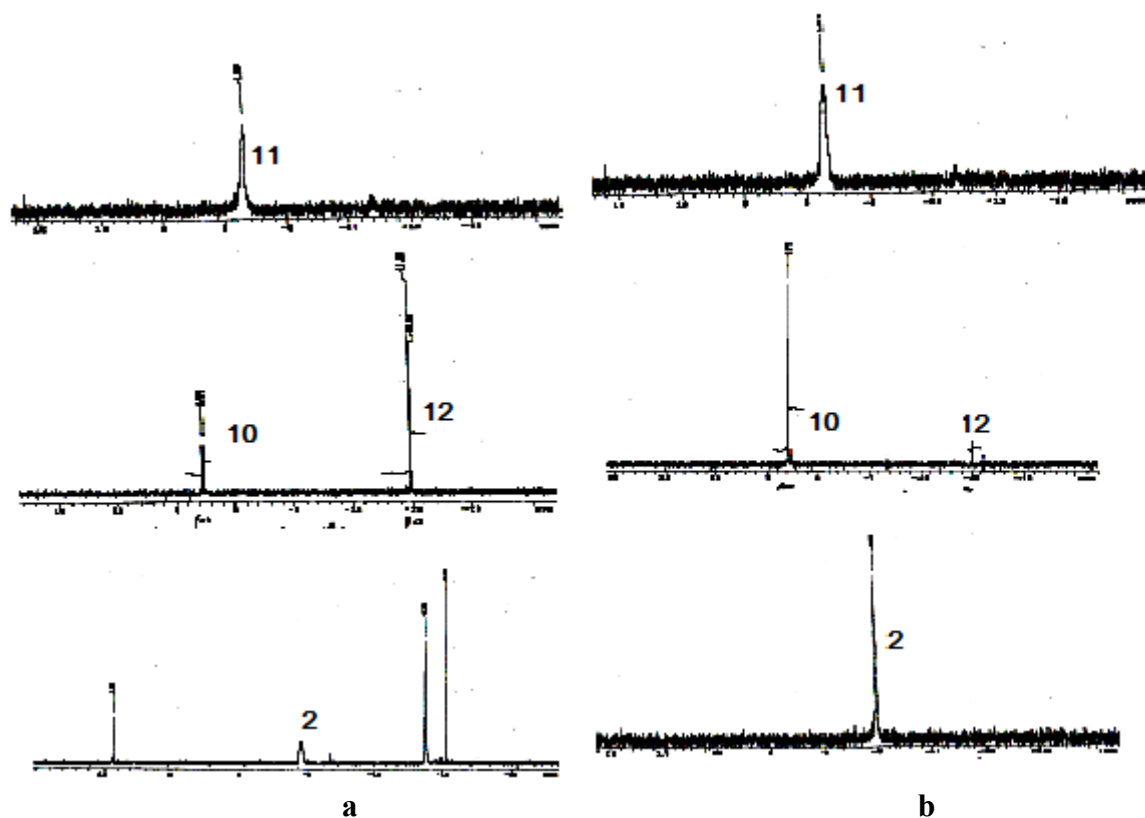

**SI Figure 4.**  $^{31}\text{P}$ -NMR study of the phosphorylation step. **a**:  $(\text{COCl})_2$  was added to **11**, followed by DMF; **b**: **11** was added very slowly to the mixture of  $(\text{COCl})_2$  and DMF. **10**: BisPOM phosphoryl chloride; **11**: bisPOM phosphate; **12**:  $(\text{POM})_4$ pyrophosphate; **2**: Fmoc-Ser(PO(OPOM) $_2$ )- $\Psi[(Z)\text{CH}=\text{C}]$ -Pro-(2)-*N*-(3)-ethylaminoindole.



**SI Table 1.** Yields for the phosphorylation step using different bases.

| Base                     | Temperature | Yield |
|--------------------------|-------------|-------|
| Et <sub>3</sub> N        | -40 °C      | < 20% |
| Et <sub>3</sub> N        | rt          | < 20% |
| DIEA                     | rt          | < 20% |
| collidine                | rt          | < 20% |
| NMM                      | rt          | < 20% |
| Pyridine (8 equivalents) | -40 °C      | 20%   |
| Pyridine (8 equivalents) | rt          | 25%   |
| Pyridine (large excess)  | -40 °C      | 22%   |
| Pyridine (large excess)  | rt          | 30%   |

**SI References**

1. Wang, X. J.; Xu, B.; Mullins, A. B.; Neiler, F. K.; Etkorn, F. A. *J. Am. Chem. Soc.* **2004**, *126*, 15533.
2. Wang, X. J.; Hart, S. A.; Xu, B.; Mason, M. D.; Goodell, J. R.; Etkorn, F. A. *J. Org. Chem.* **2003**, *68*, 2343.
3. Hwang, Y.; Cole, P. A. *Org Lett* **2004**, *6*, 1555.
4. Abdel-Kader, M.; Berger, J. M.; Sleboznick, C.; Hoch, J.; Malone, S.; Wisse, J. H.; Werkhoven, M. C.; Mamber, S.; Kingston, D. G. *J. Nat. Prod.* **2002**, *65*, 11.
5. Kapustin, G.; Fejér, G.; Gronlund, J. L.; Seto, E.; McCafferty, D. G.; Etkorn, F. A. *Org. Lett.* **2003**, *5*, 3053.

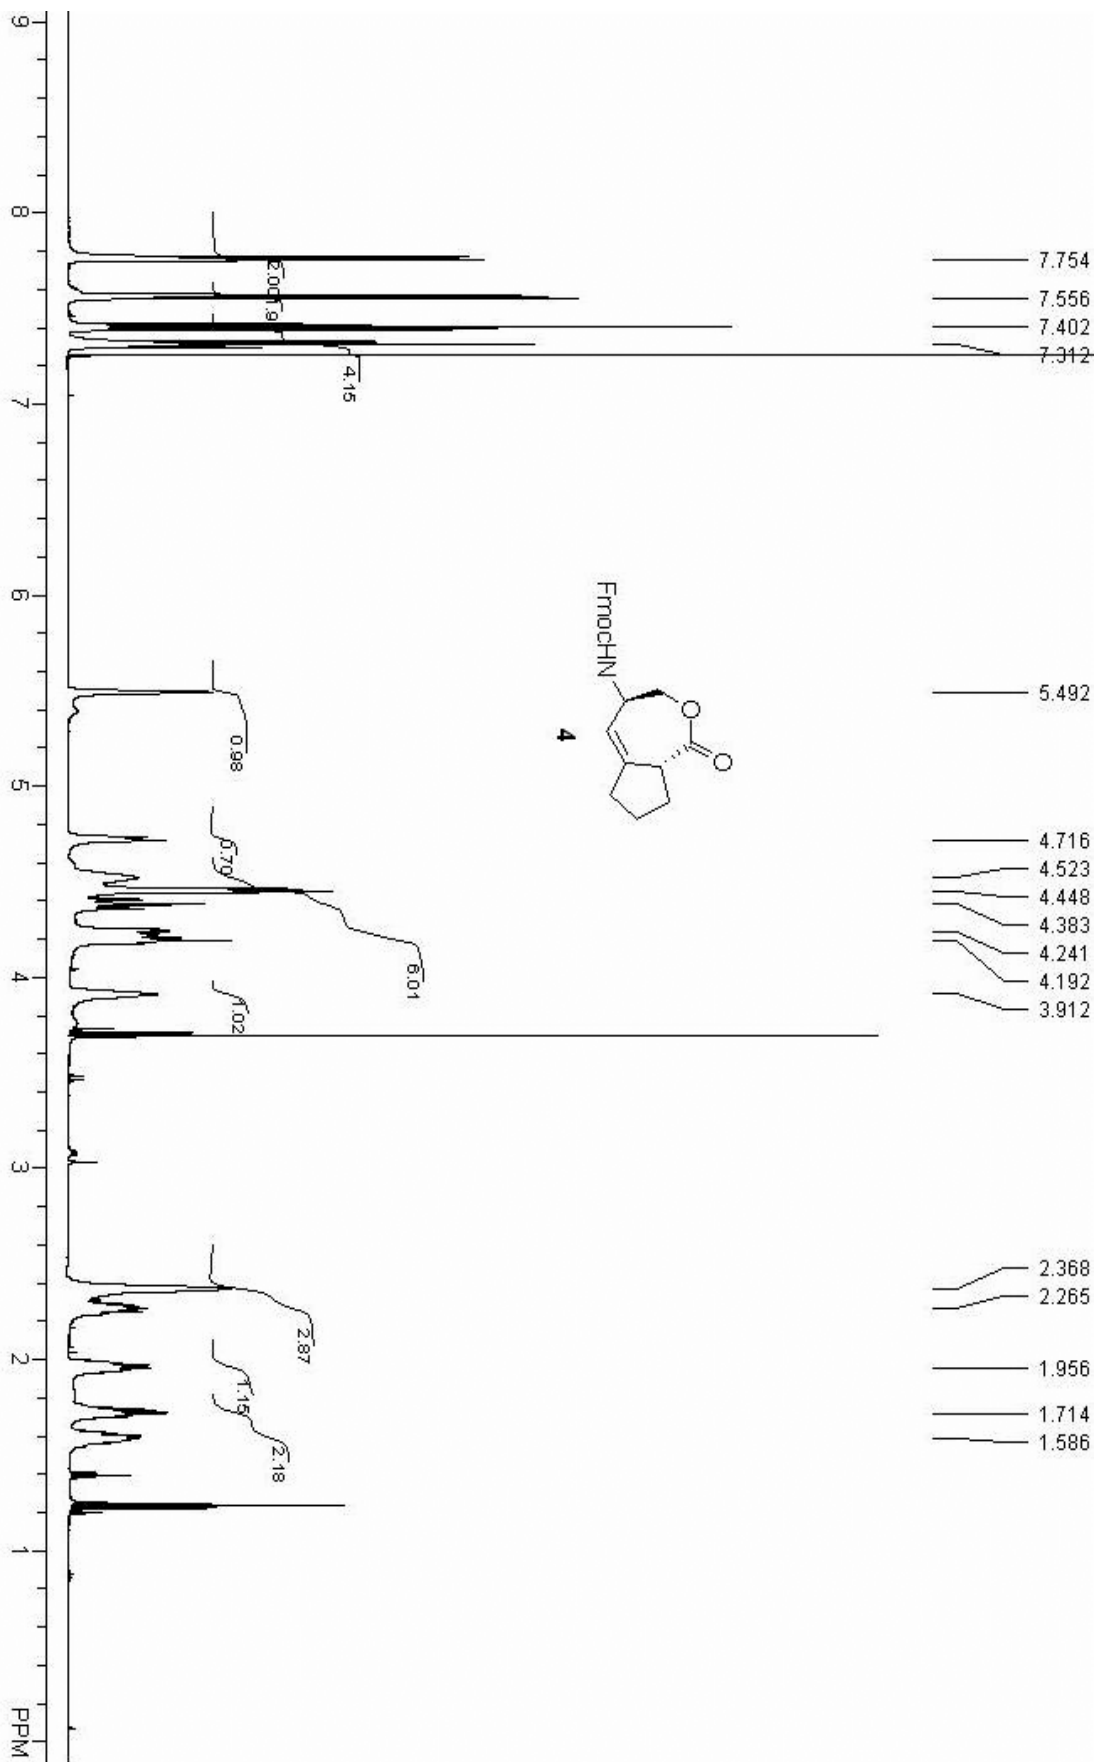

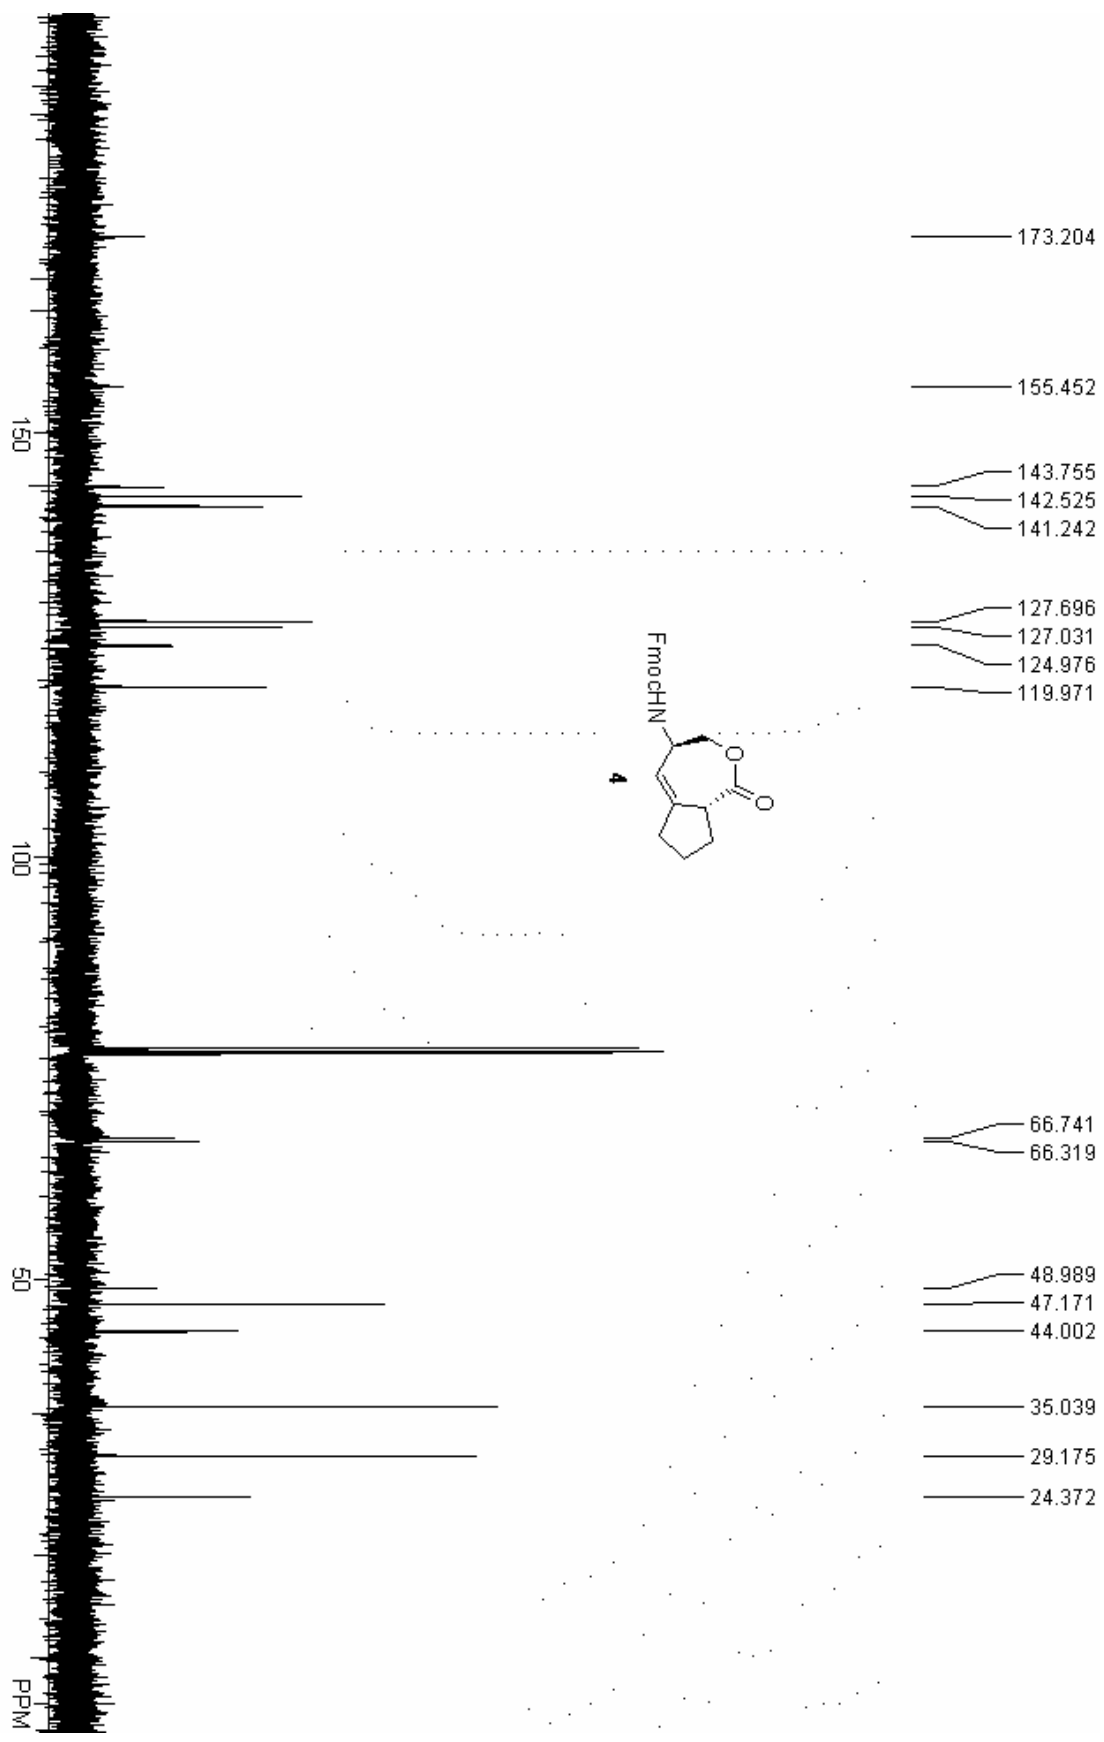

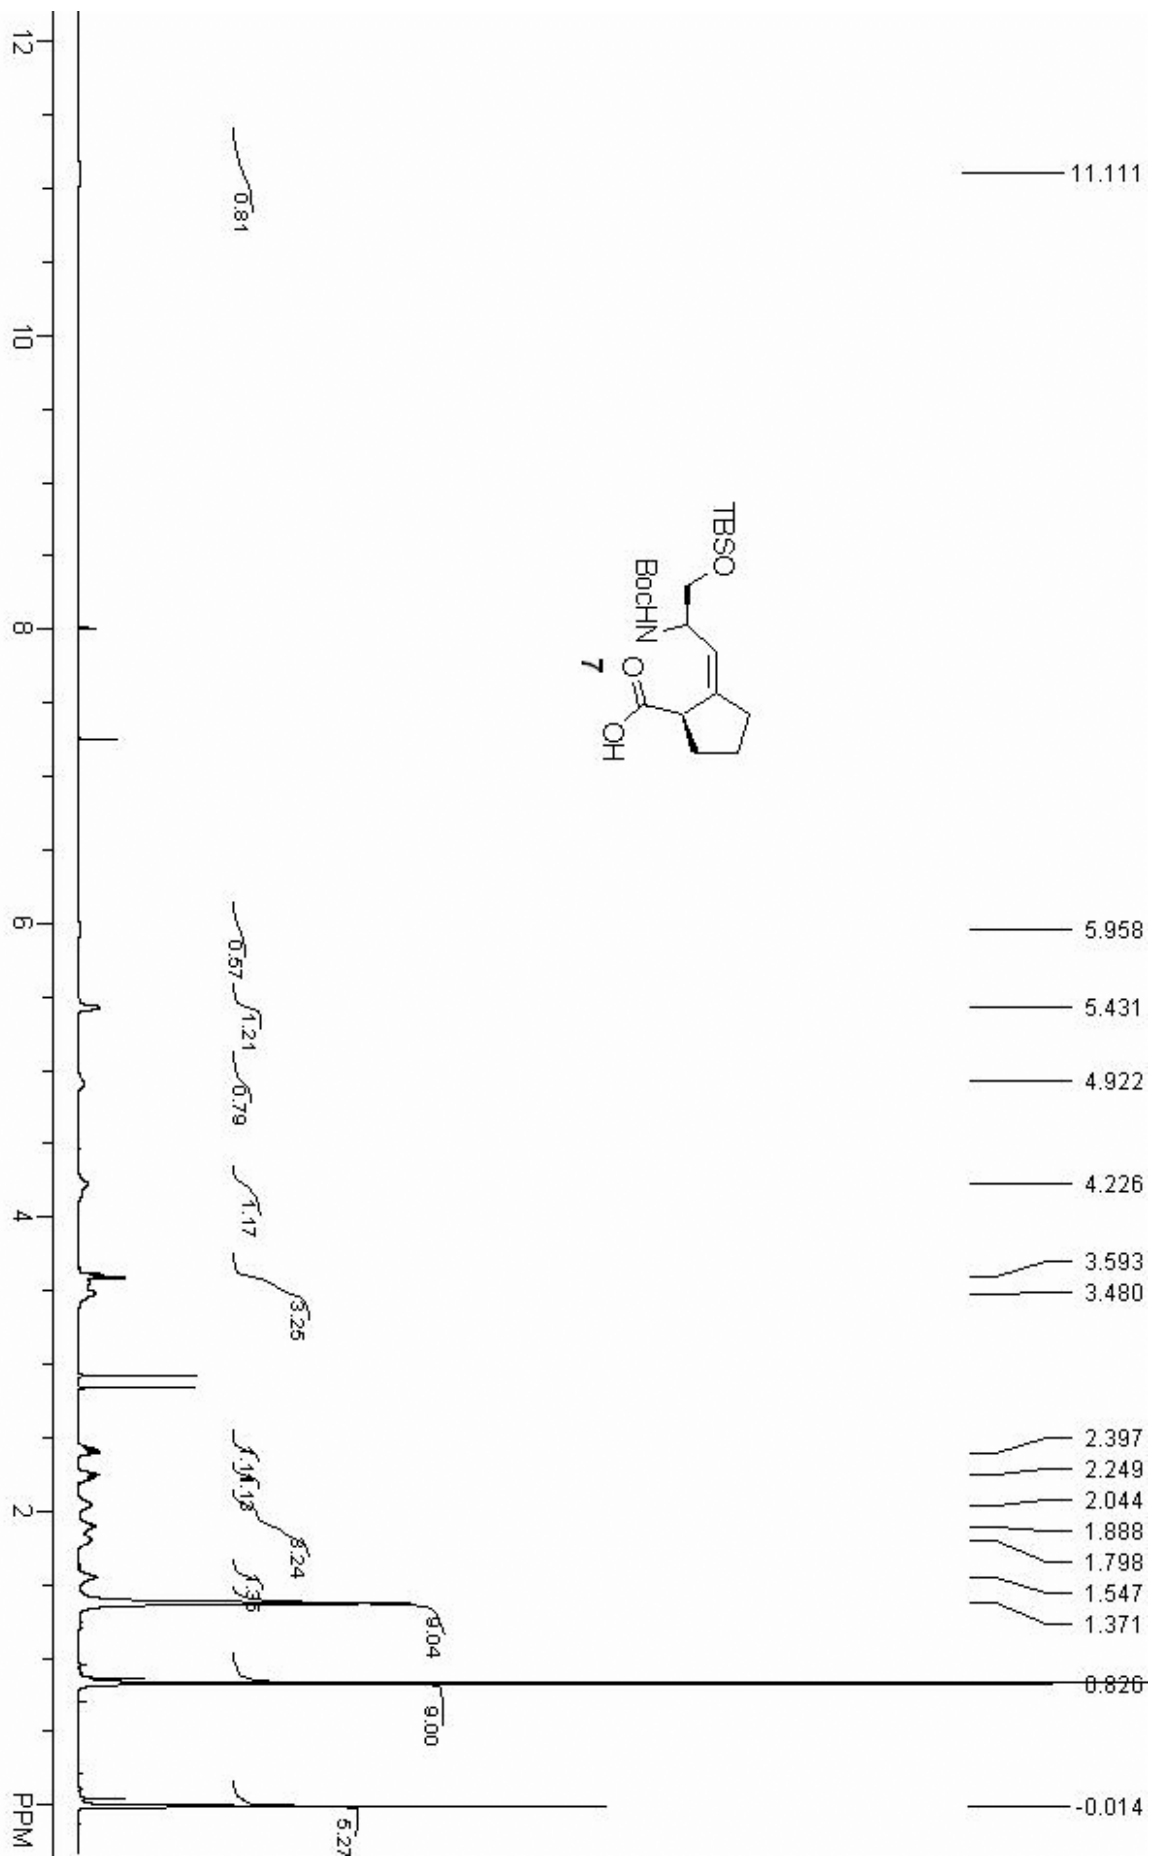

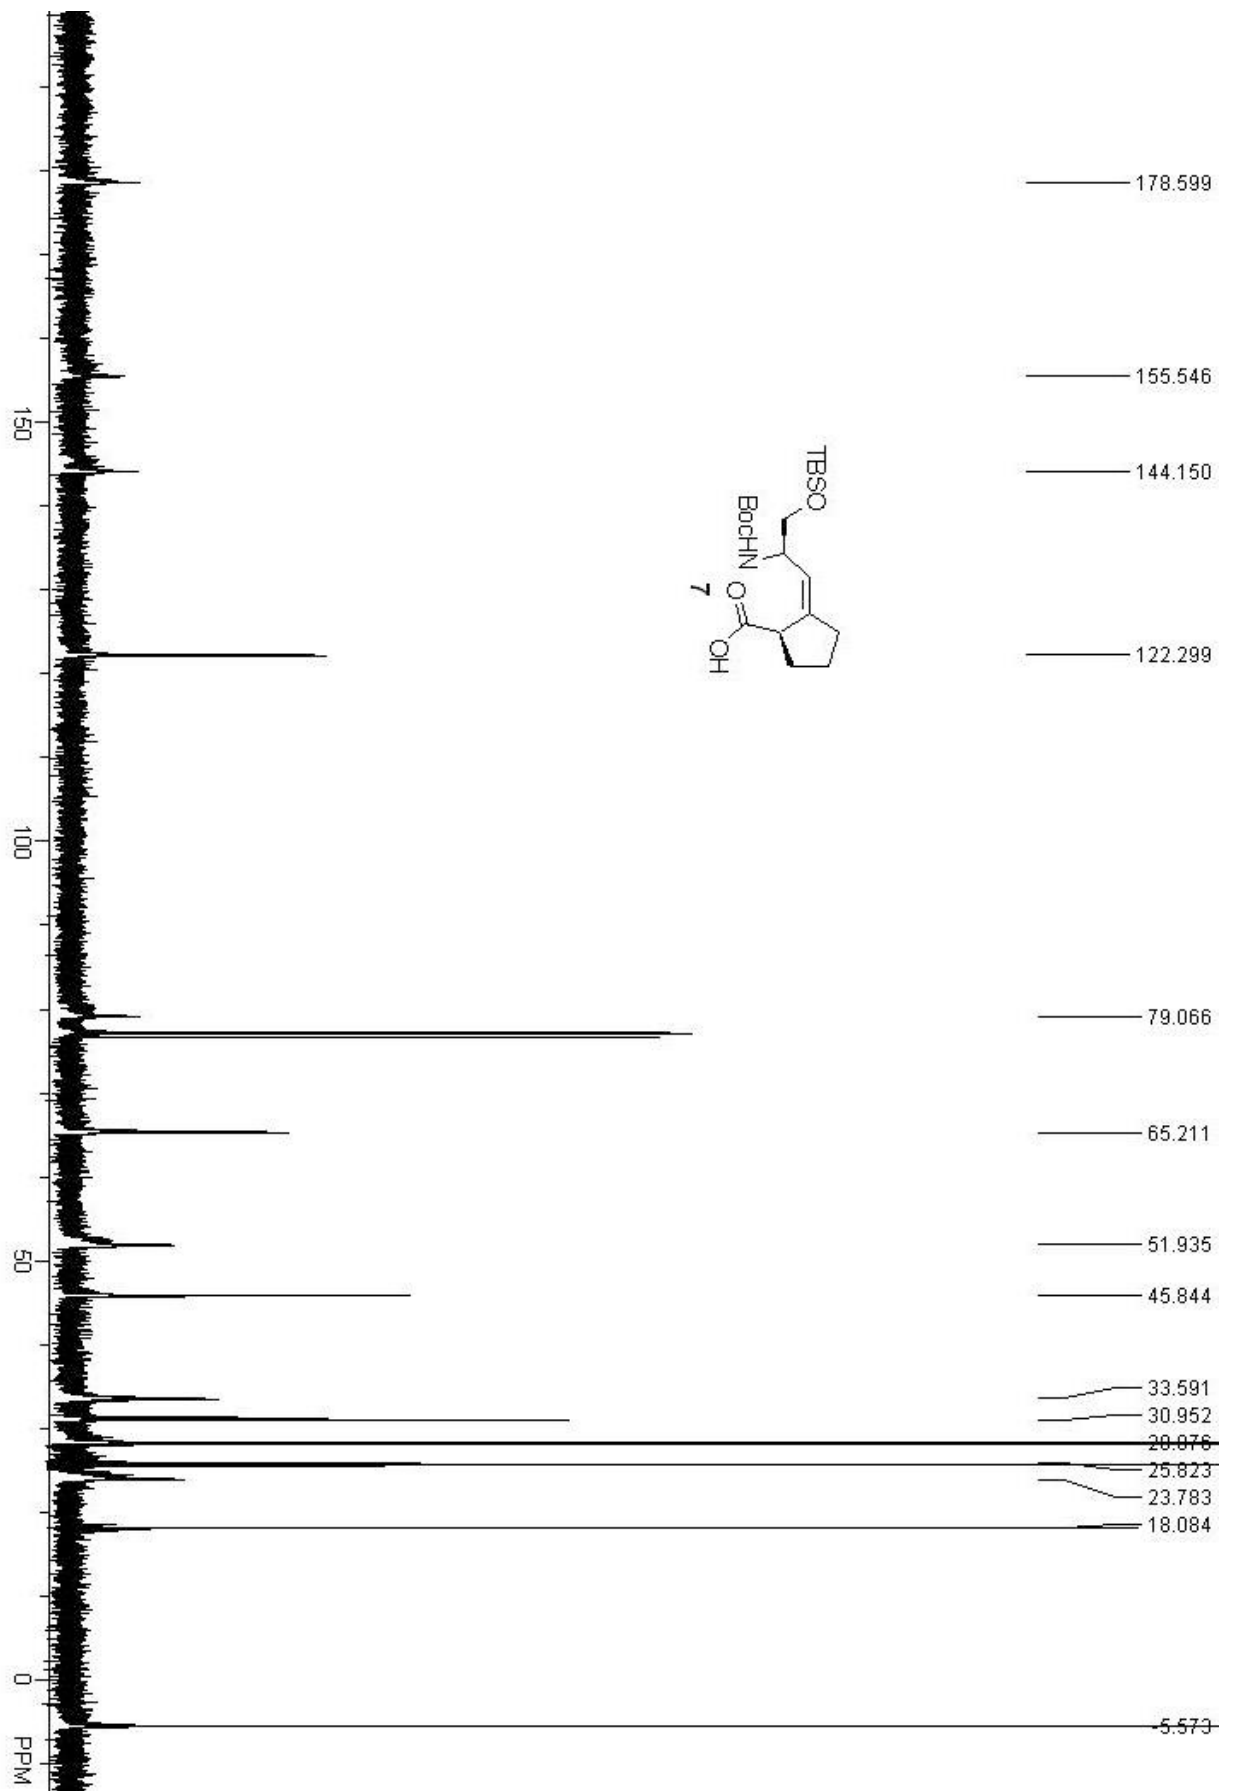

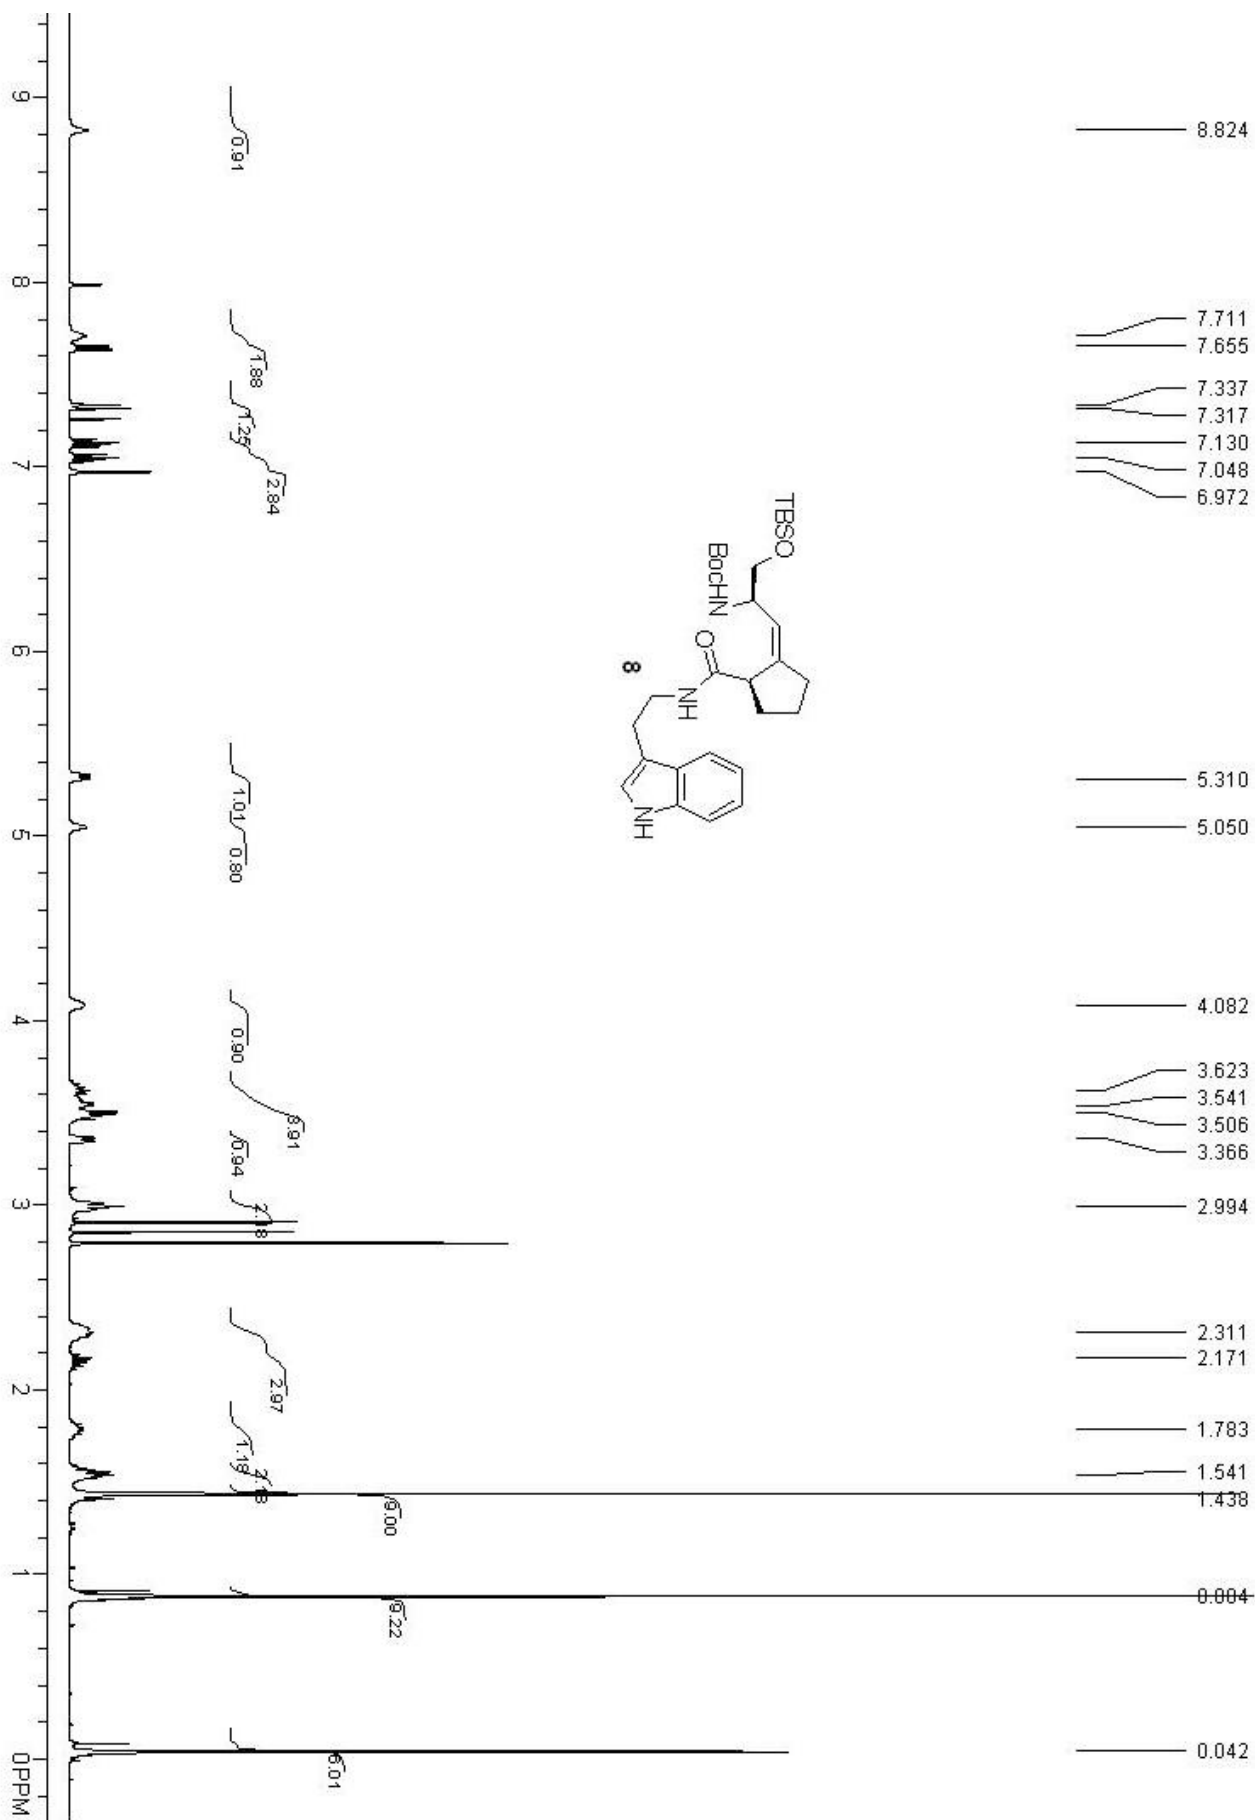

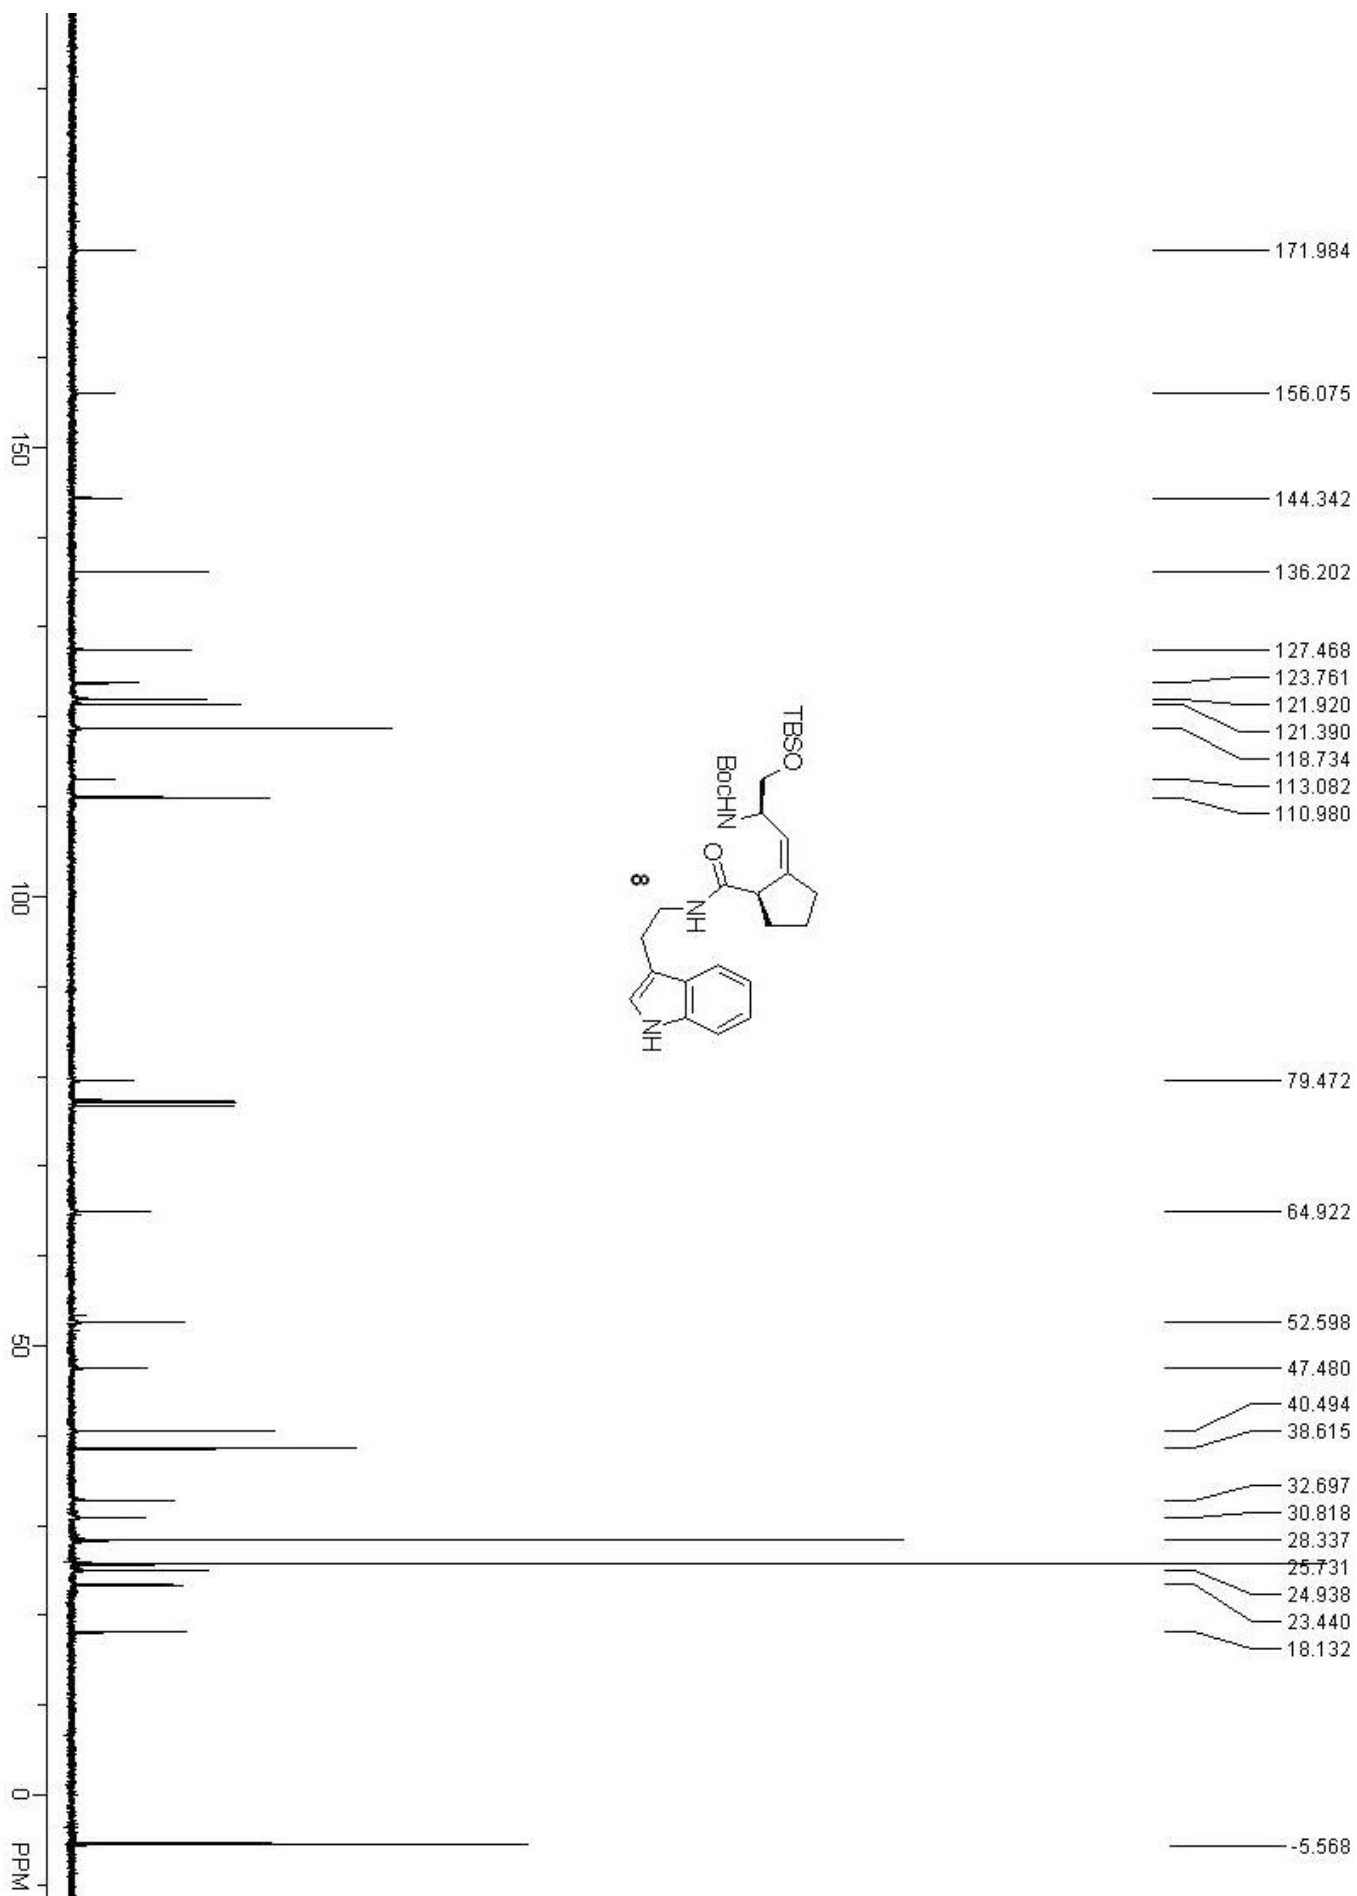

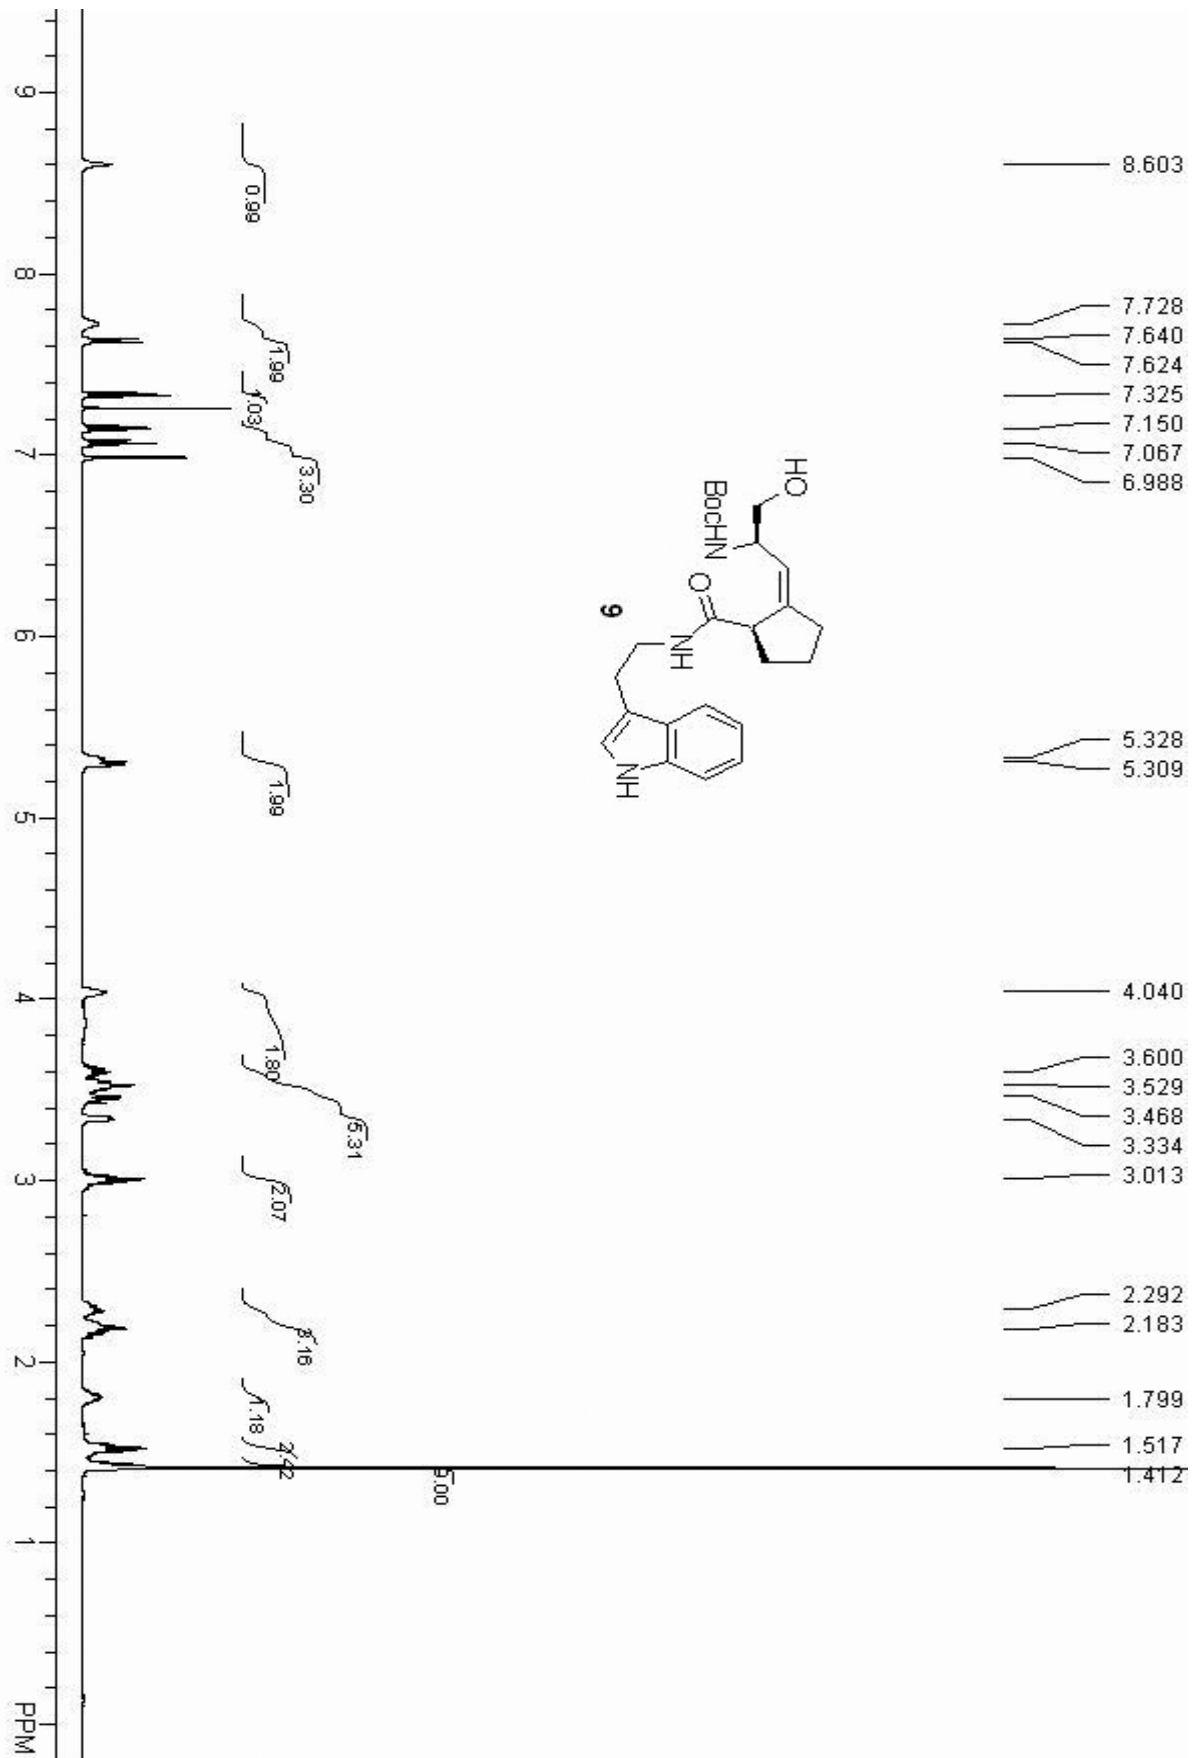



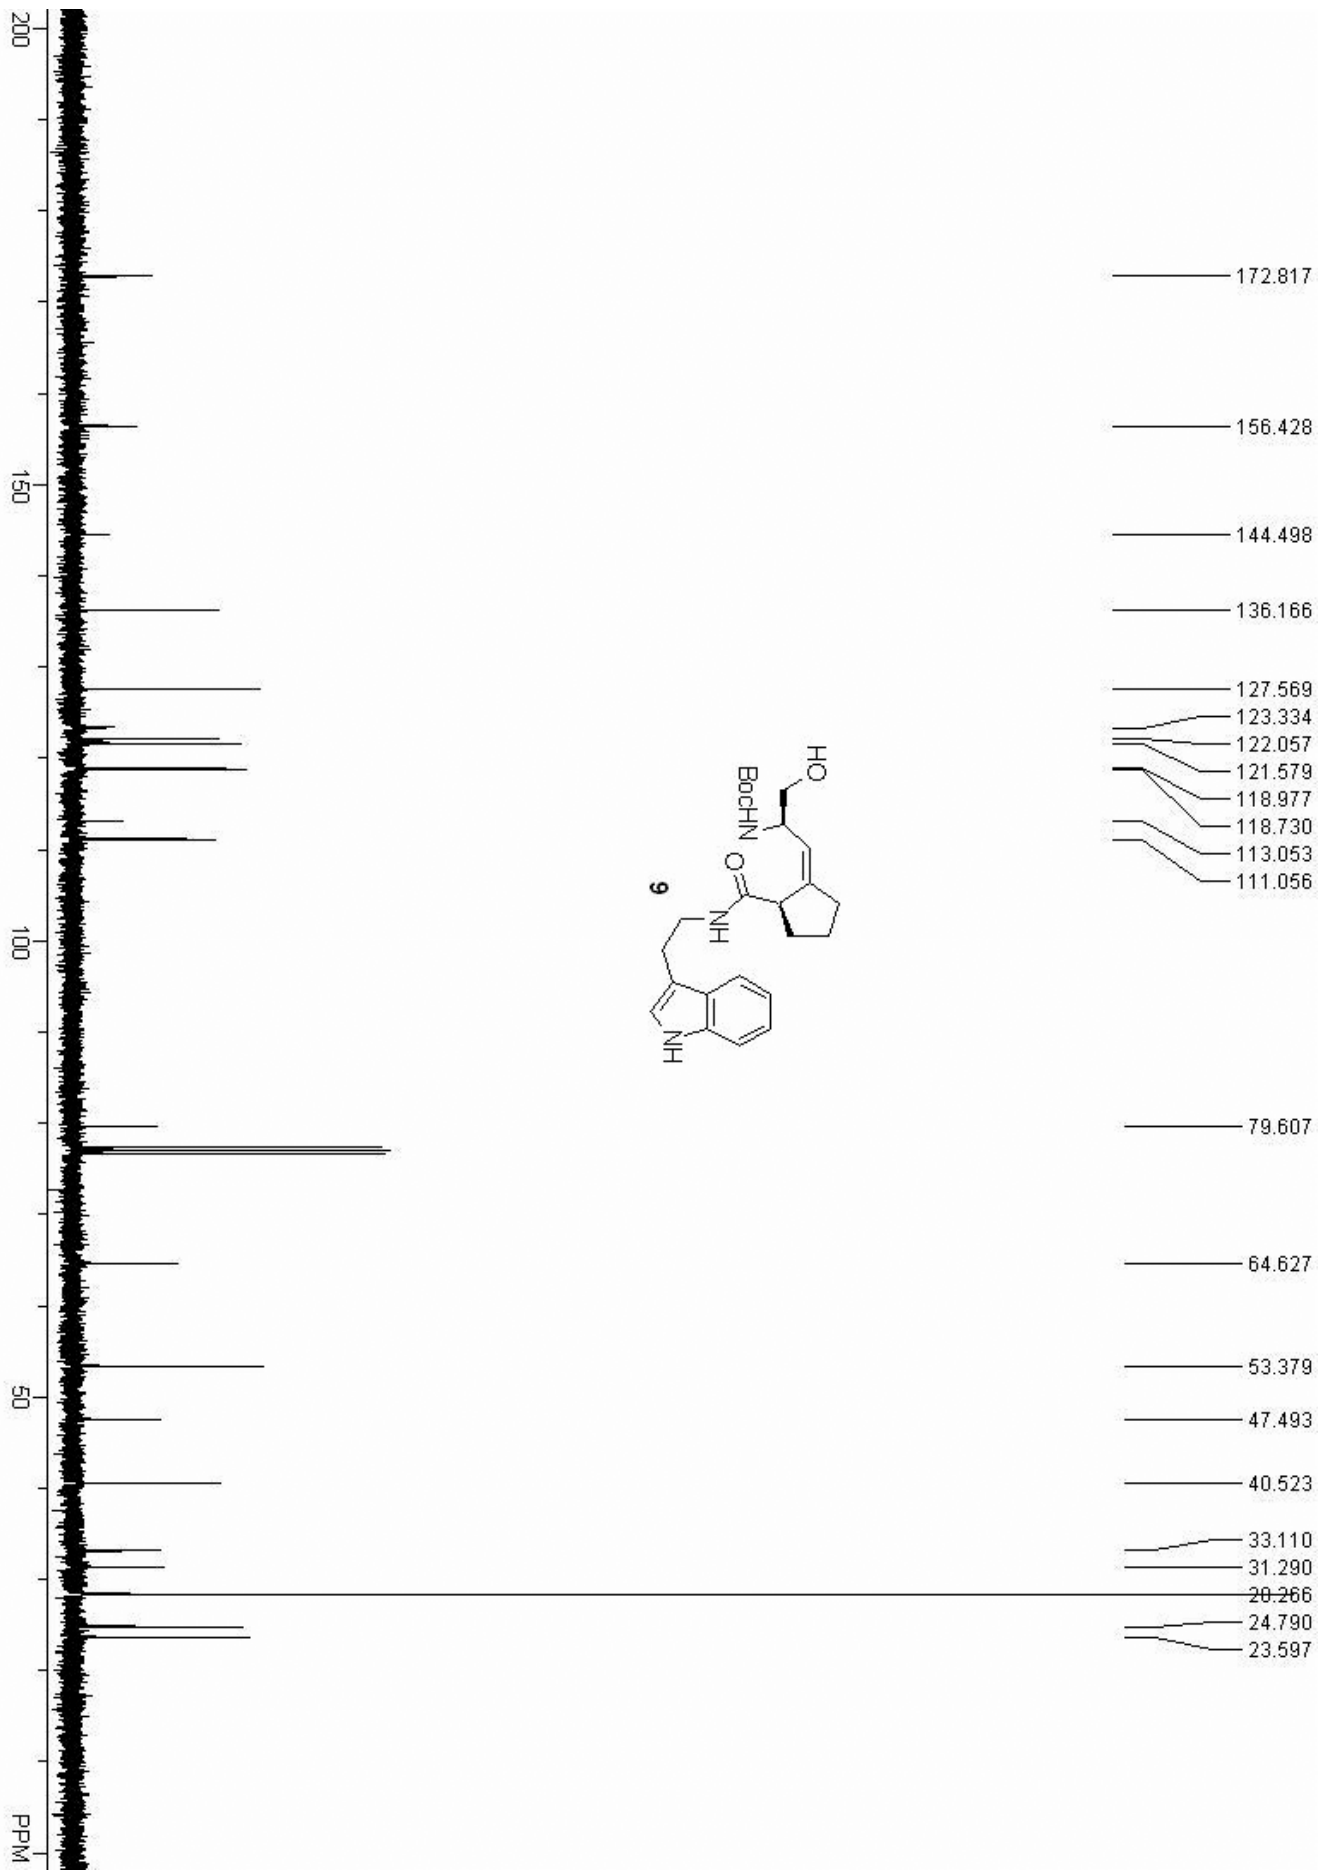

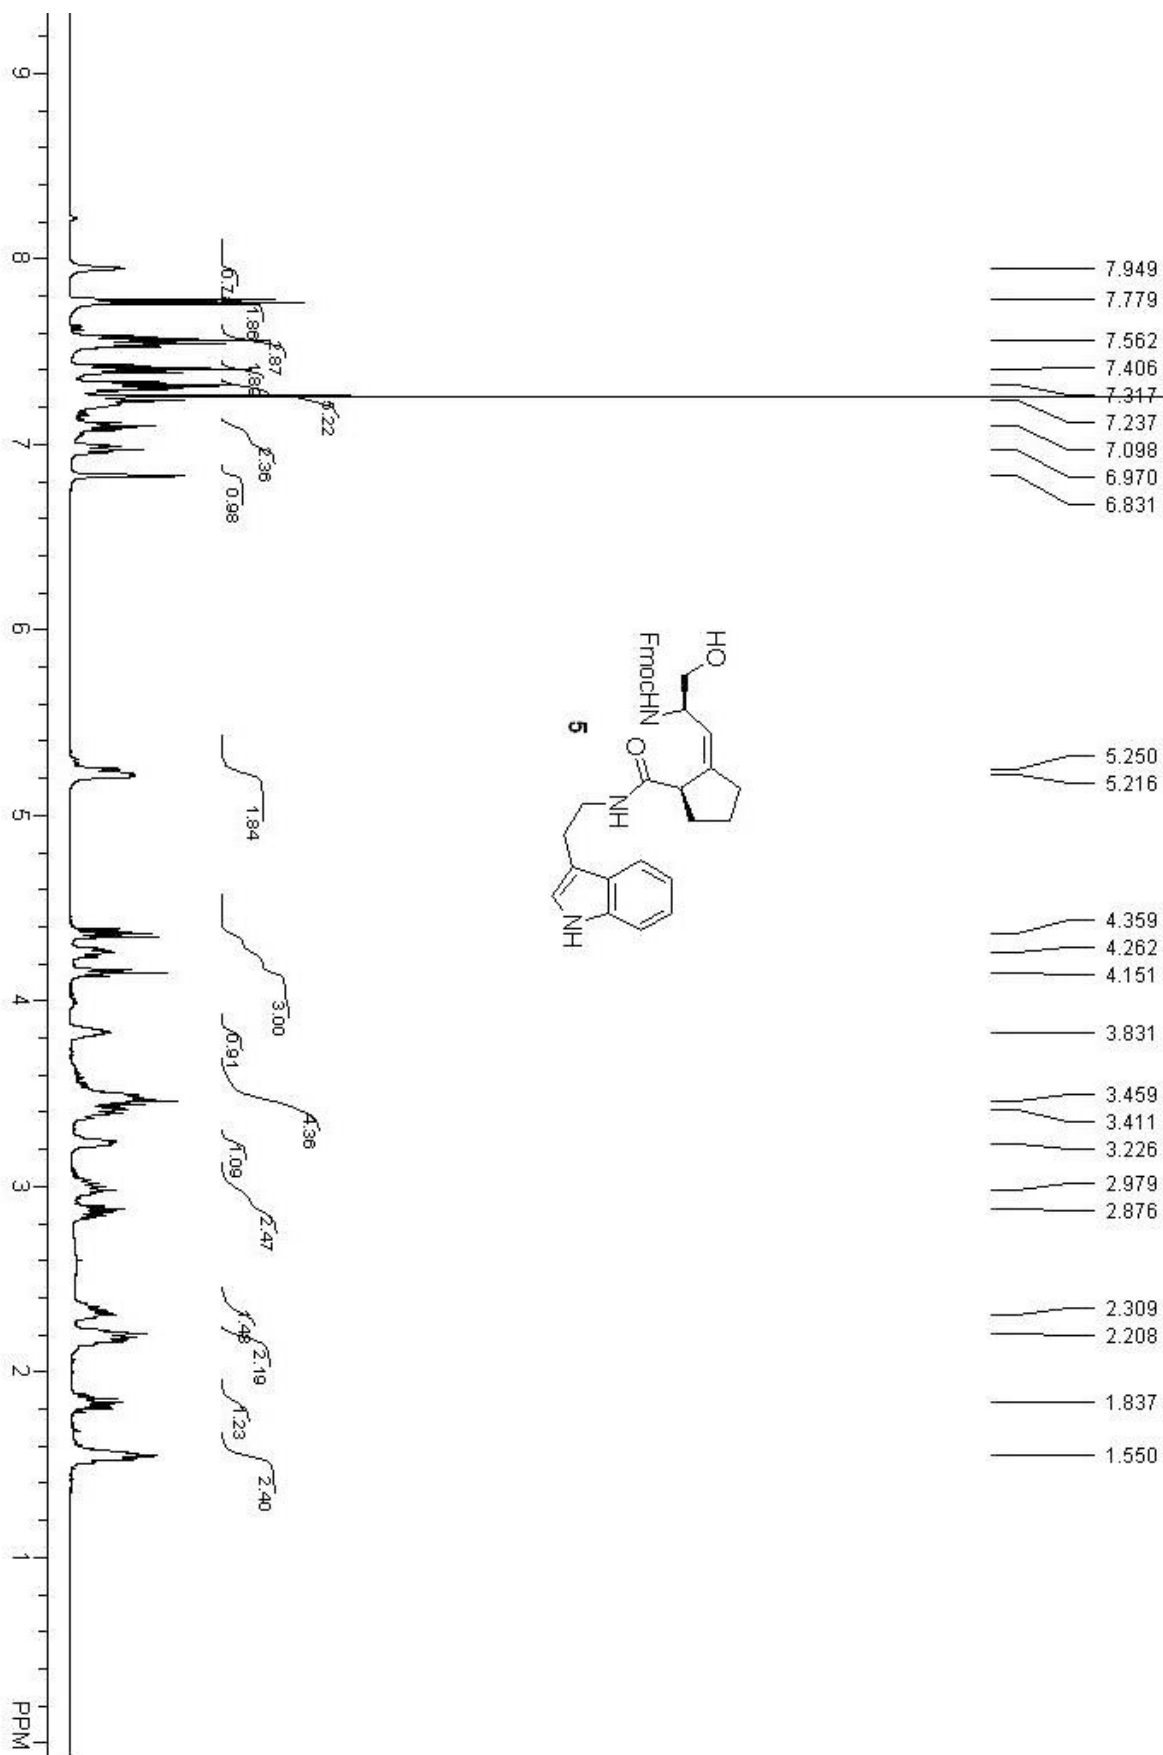

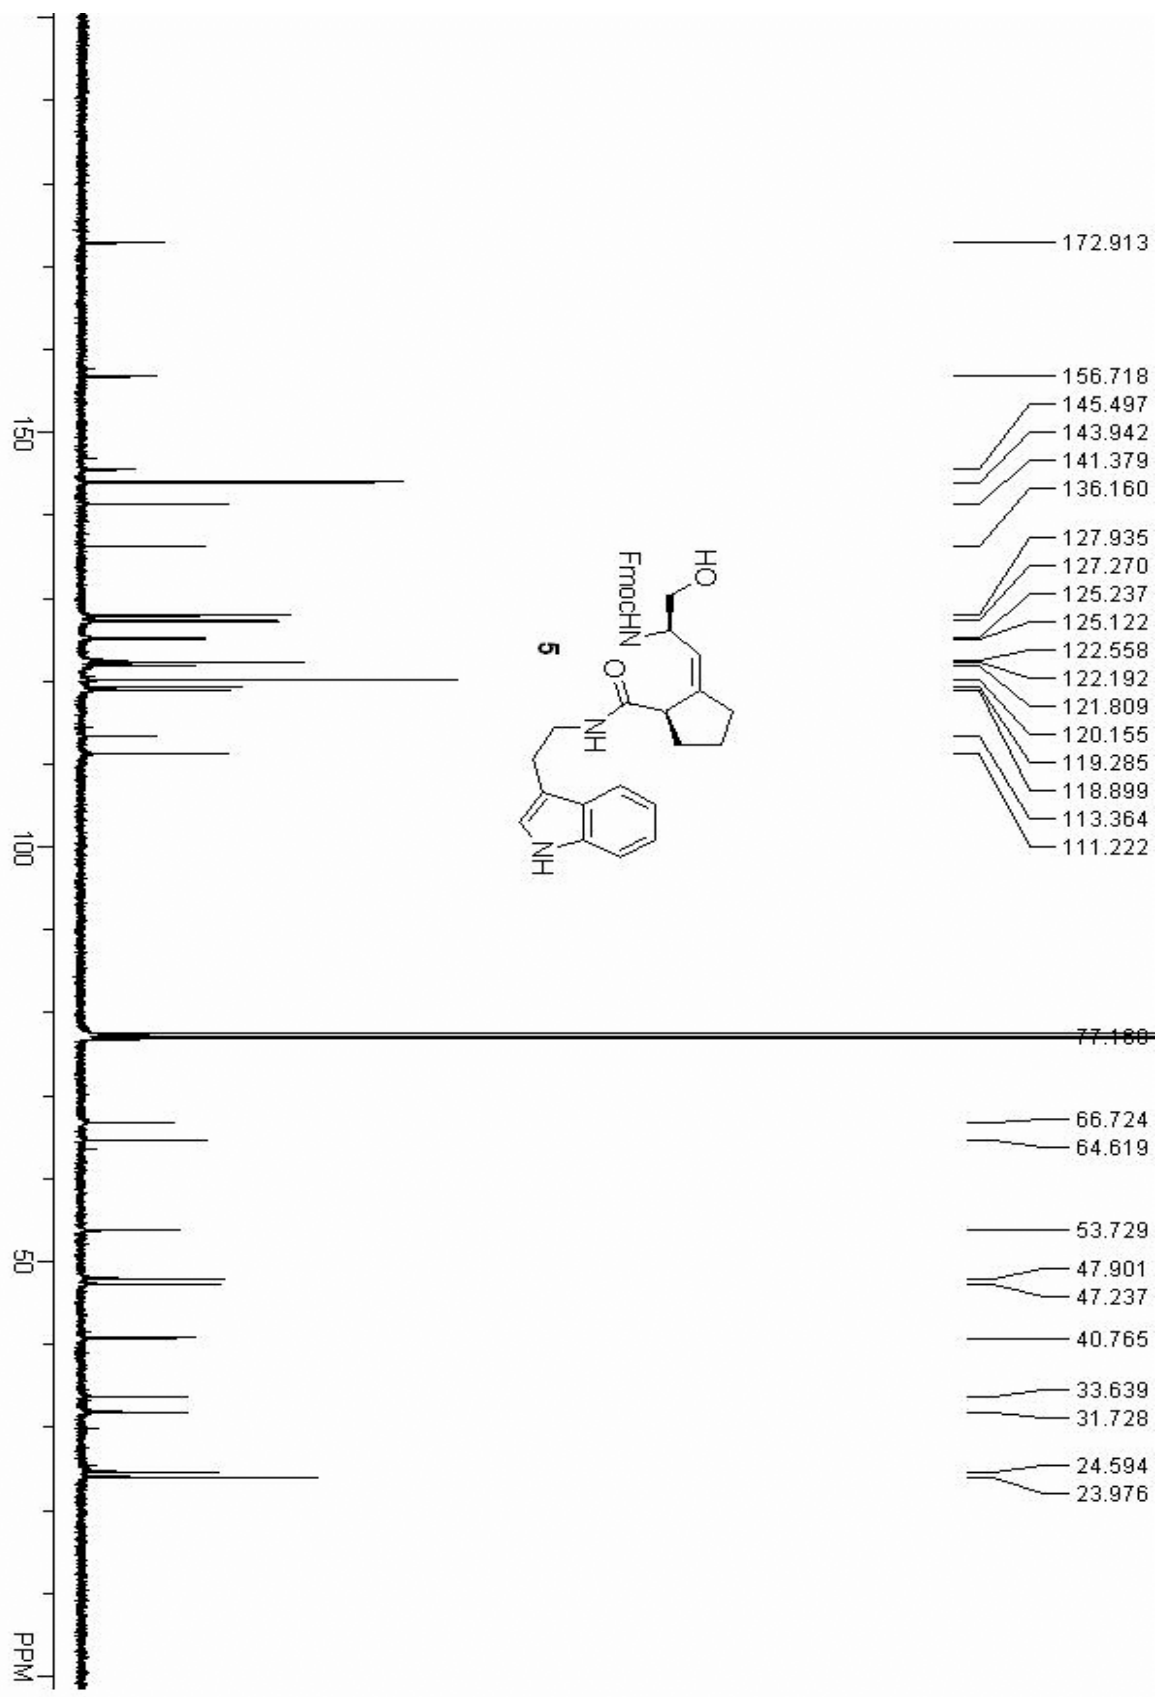

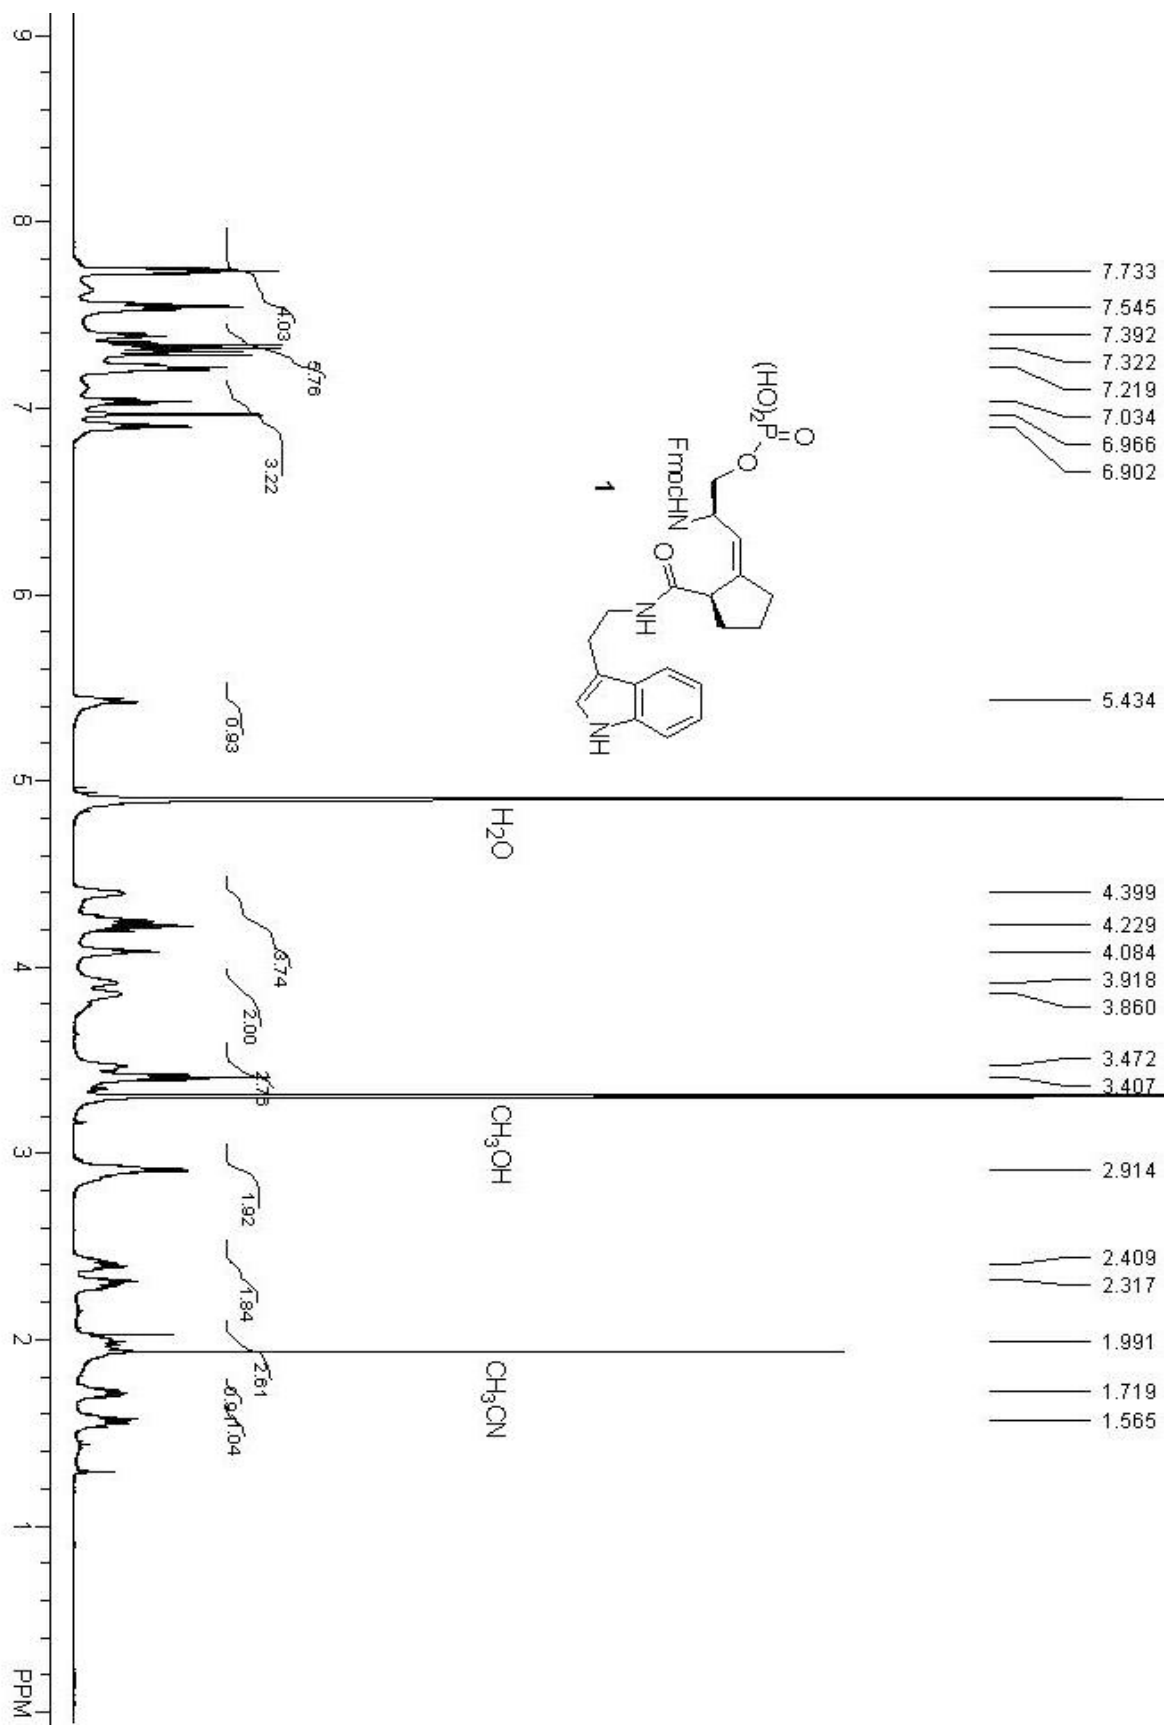

13C OBSERVE

Pulse Sequence: zgpg30  
Solvent: CD3OD  
Ambient temperature  
UNITY-400 "unity400"

Relax. delay 1.000 sec  
Pulse 45.4 degrees  
Acq. time 1.139 sec  
Width 25000.0 Hz  
21696 repetitions  
OBSERVE C13, 100.625475 MHz  
DECUPLE H1, 399.9822793 MHz  
Power 40 dB on  
Continuously  
Not auto-tuned  
DATA PROCESSING  
Line broadening 1.0 Hz  
FT size 65536  
Total time 613 hr., 56 min., 48 sec  
Mar 20 2006  
VA Tech Chemistry NMR Lab

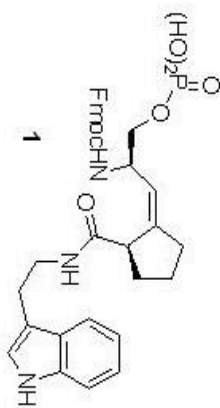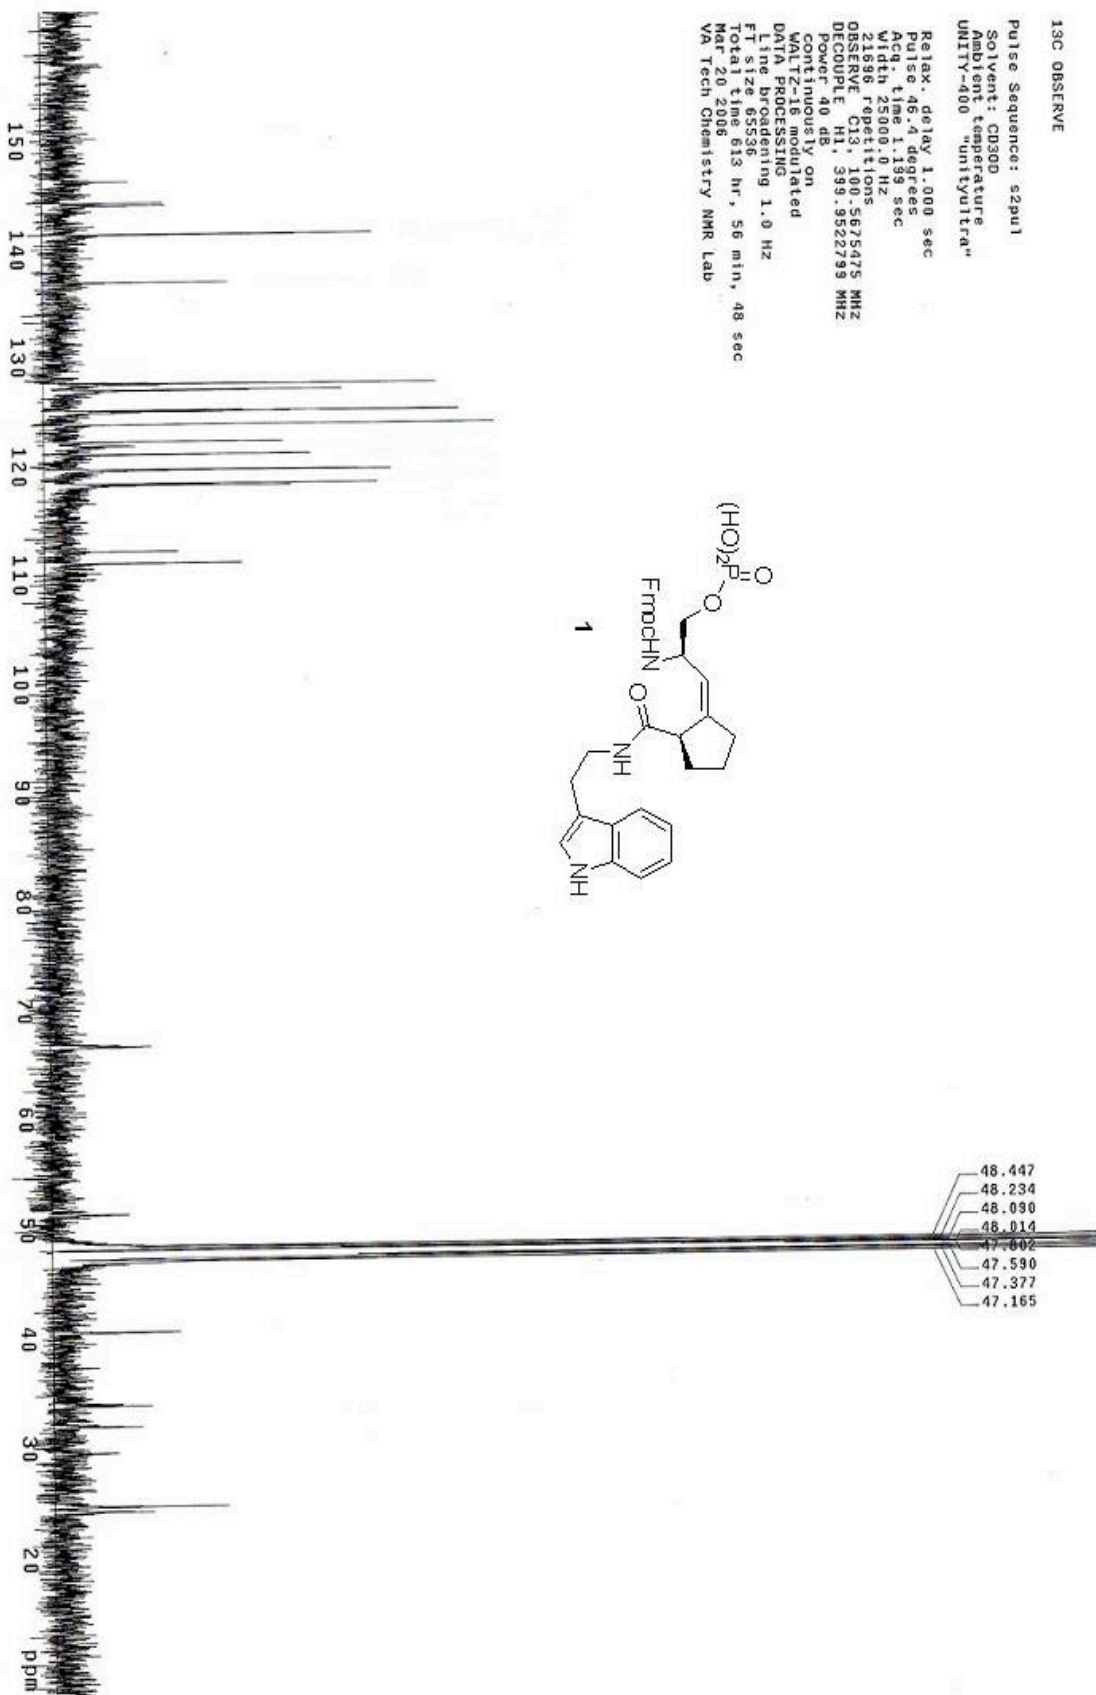

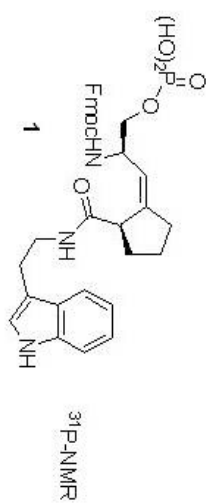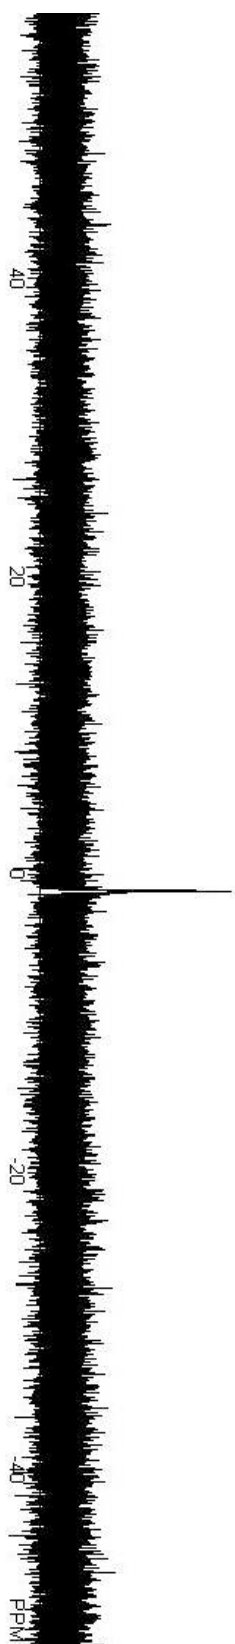

-1.164

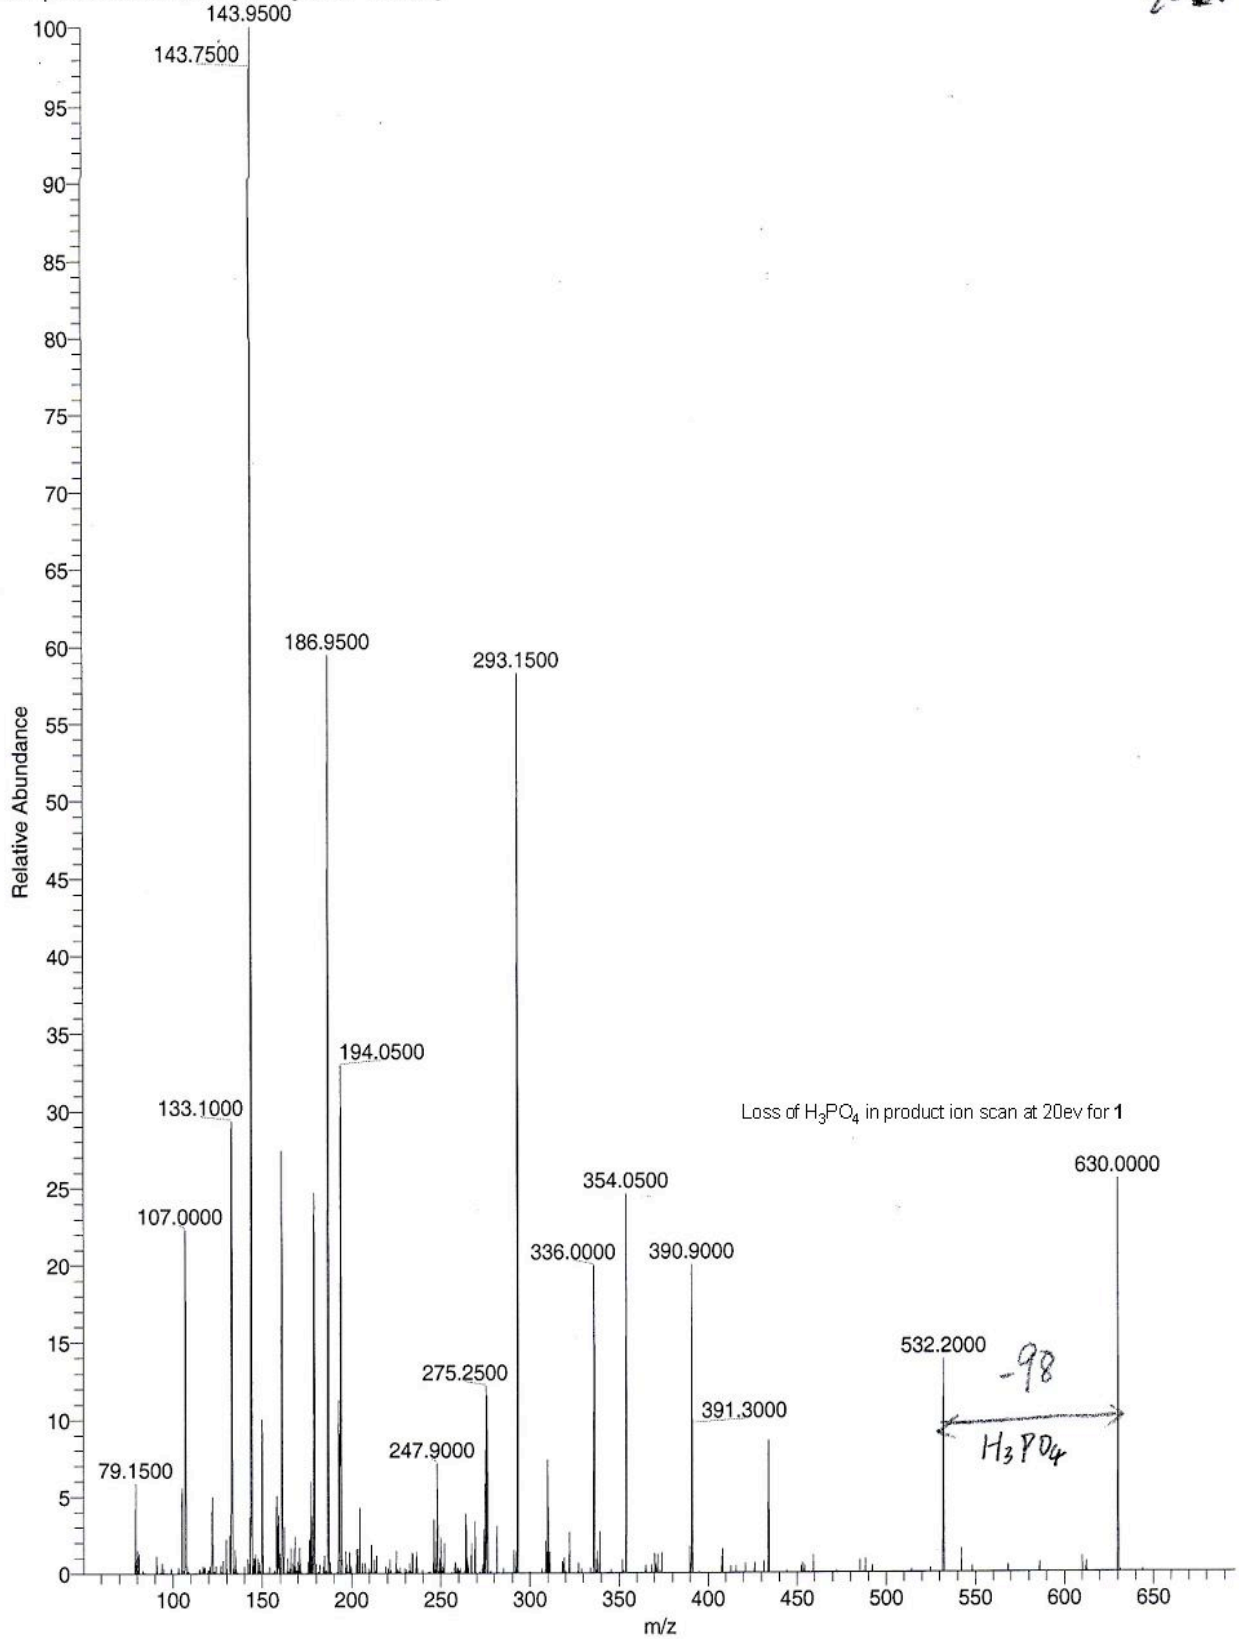

Data File: c:\star\guoyanxu\6-24-2007 5:57:33 pm  
 Sample ID: Manual Sample  
 Operator (Inj): Operator  
 Injection Date: 06/24/2007 05:57:33  
 Injection Method: c:\star\song zhaolanalysis of  
 Peak Measurement:  
 Calculation Type: Percent

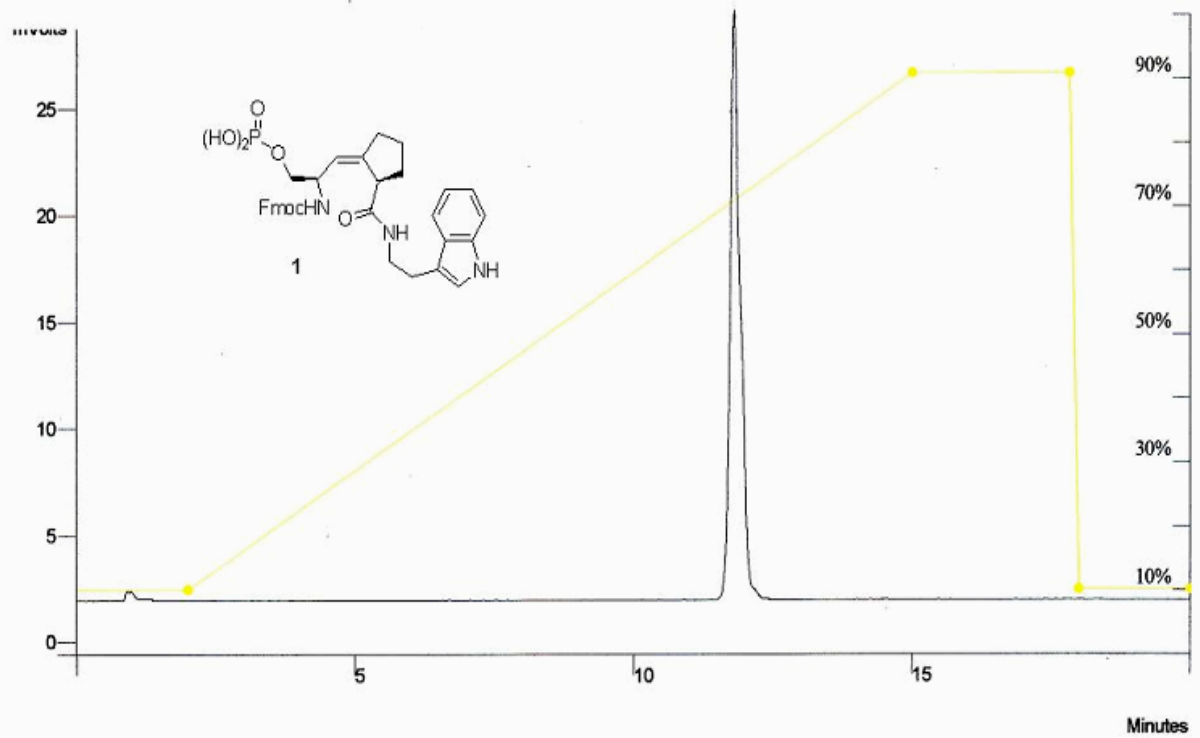

| Ret Time (min) | Peak Area (counts) | Result (area %) |
|----------------|--------------------|-----------------|
| 0.91           | 4722               | 1.2             |
| 11.79          | 235011             | 98.8            |
|                | 239733             | 100             |



STANDARD 1H OBSERVE

Pulse Sequence: s2pu1  
 Solvent: CDCl3  
 Ambient temperature  
 File: ZS-IV-105-3Proton1\ncdcl3\july142007\_3  
 INOVA-400 "inova400a1t"

Relax. delay 1.000 sec  
 Pulse 22.1 degrees  
 Acq. time 3.744 sec  
 Width 6499.8 Hz  
 1500 repetitions  
 OBSERVE H1, 399.944186 MHz

DATA PROCESSING  
 Line broadening 0.2 Hz  
 FT size 65536  
 Total time 1 hr, 58 min, 49 sec  
 Jul 14 2007  
 VA Tech Chemistry NMR Lab

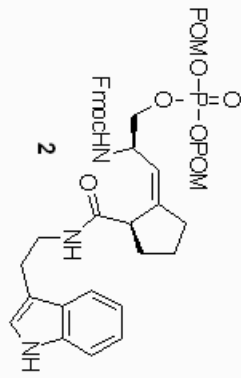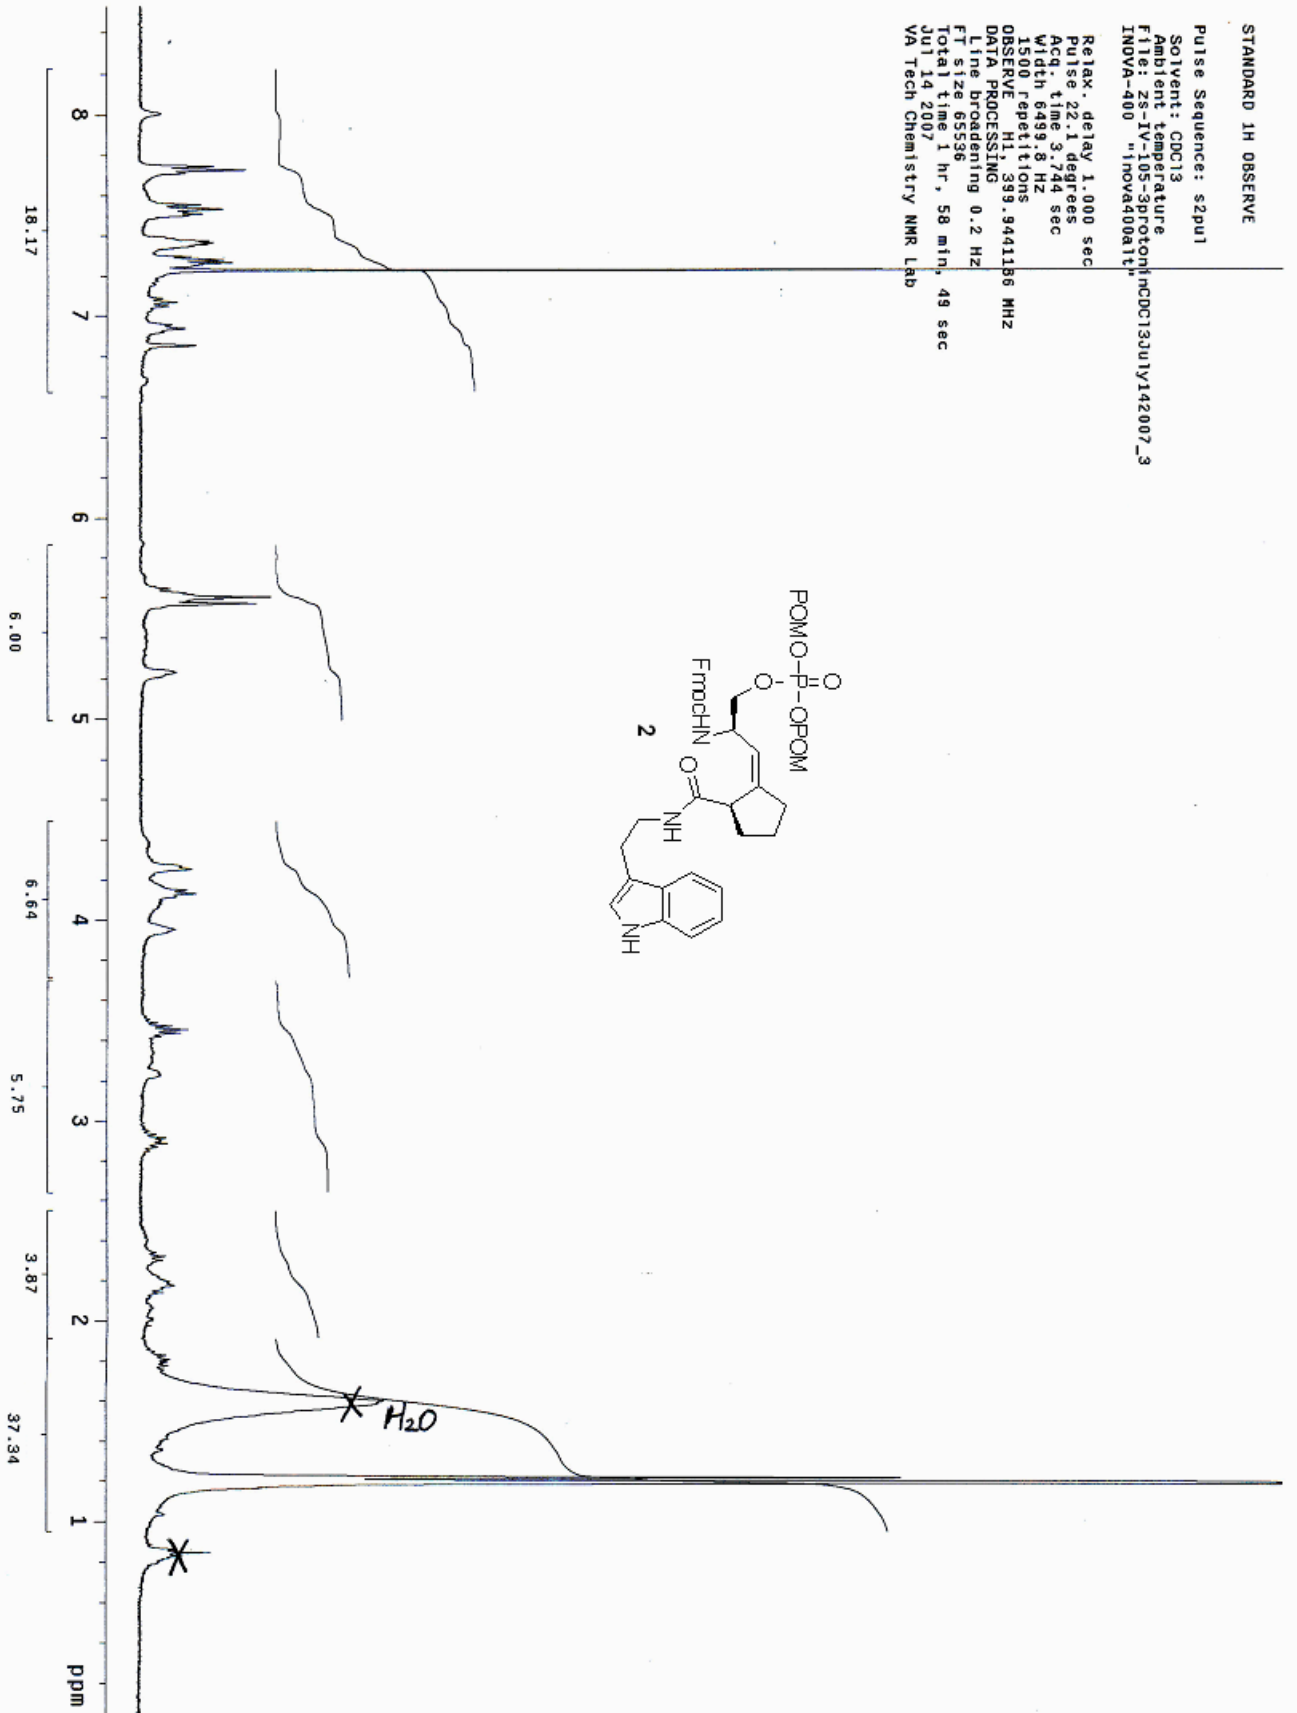

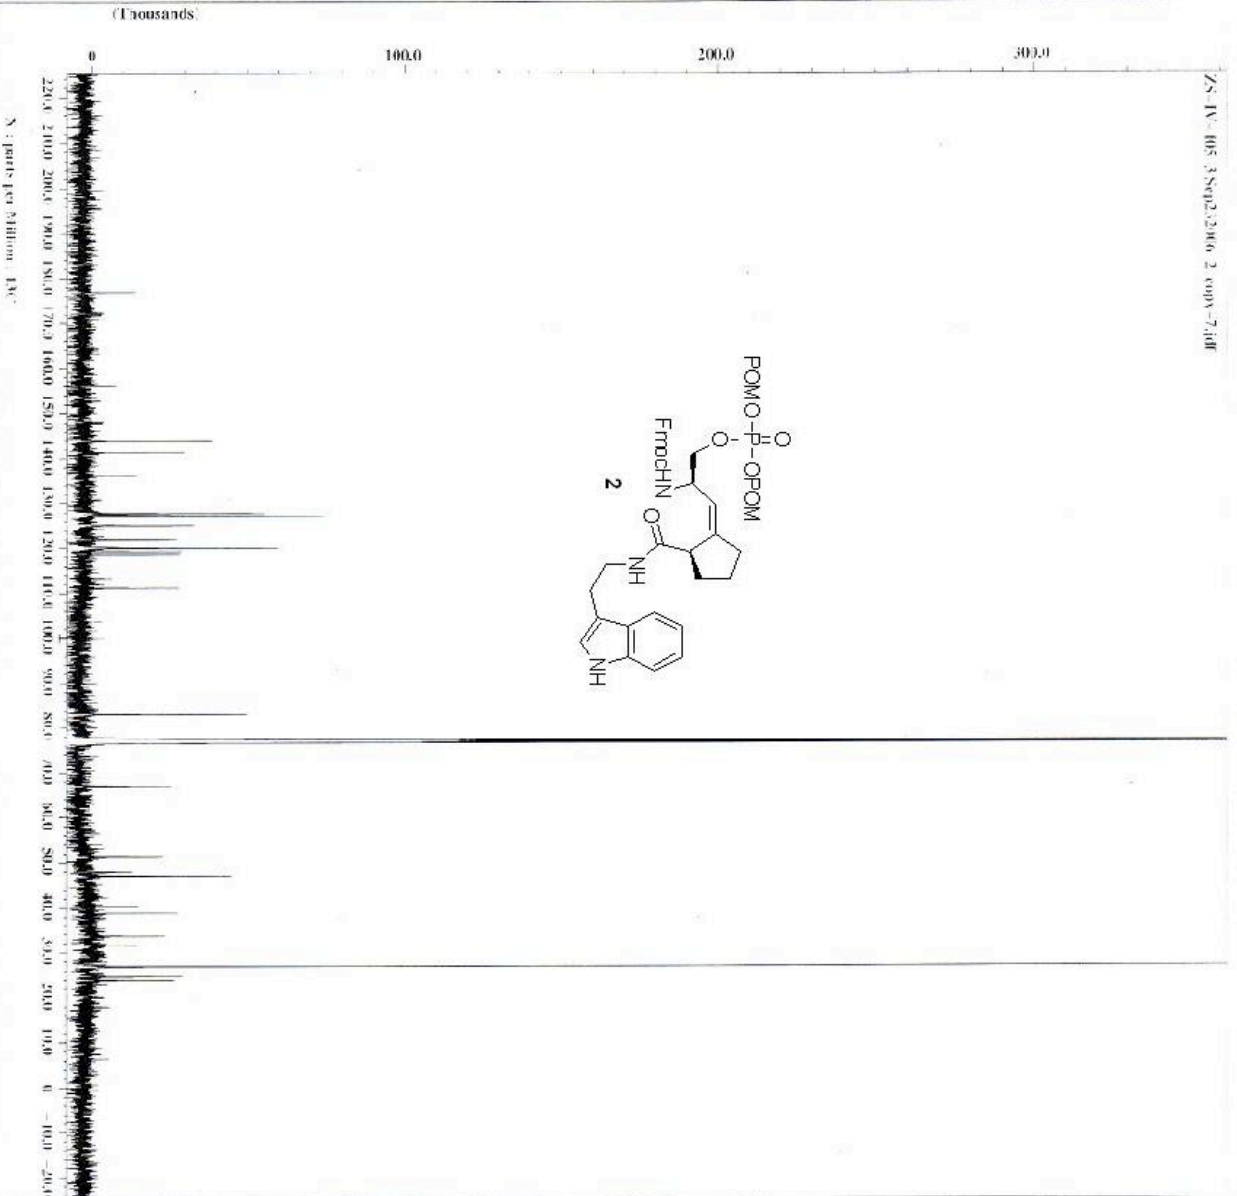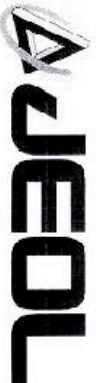

```

File Name      = ZS-IV-105_3_Sep232306
Acq No        = 1
Experiment     = Single_Pulse_Dec
Samp_e Id     = ZS-IV-105_3_Sep232306
Solvent       = CHLOROFORM-D
Treatmt       = 2176_12.01.18
Acq Date      = 23-Sep-2006 09:55:43
Relaxation    = 23-SEP-2006 09:56:43
Current Time   = 23-SEP-2006 09:56:43

Content
Data format   = Single_Pulse_waltz_Bro
Dim size      = 1D COMET3X
Dim file      = 32768
Dim units     = [ppm]
Dimensions    = X
Site          = DELTA NMR
Spectrometer  = DELTA NMR

F1: a1d_strangth = 11.7473579 [Hz] (500kHz)
X: acq_durati:cn = 1.043224 [s]
X: dname       = 13C
X: Freq        = 125.75529768 [kHz]
X: offset     = 100 [ppm]
X: polars     = 32768
X: prescans   = 4
X: rpsweep    = 0.95967237 [Hz]
X: resol:actn = -01.445040901 [Hz]
X: sweep      = 1H
X: F1_dname   = 500_15991521 [kHz]
X: F1_freq    = 500
X: F1_offset  = 5 [ppm]
X: F1_offset  = PALSE
X: Clip:ed    = 1
X: Mar: rform = 1
X: Sems       = 61355
X: Total_sca:ns = 01235

X: 90_width    = 11 [Hz]
X: acq_time    = 1.0420224 [s]
X: angle       = 45 [deg]
X: pulse       = 5.3 [us]
X: pulse       = 1 [us]
X: initial_wol:ts = 3 [us]
X: Pules: presc:ns = 29
X: Recv: r:gain = 29
X: Relaxati:cn_delay = 1 [s]
X: Temp: g:ec  = 22.8 [C]
X: Unblank: time = 2 [s]
    
```

PHOSPHORUS OBSERVE  
STANDARD PARAMETERS  
PHOSPHATE REG-ON

Pulse Sequence: s2pul1

Solvent: CDCl3  
Acidant: temperature  
INDVA-400 mIncvad00a1r

Relax: delay 1.000 sec

Puls1s 70.0 degrees

Acq: 12036.900 sec

512 Repetitions

OBSERVE P31, 161.903068 MHz

DECOUPLE H1, 399.943183 MHz

Power: 41 dB

CONTINUOUS LY CN

WALTZ-16 modulated

DATA PROCESSING

FT size 131072

Total time 25 min, 43 sec

May 1 2016

VA Tech Chemistry NMR Lab

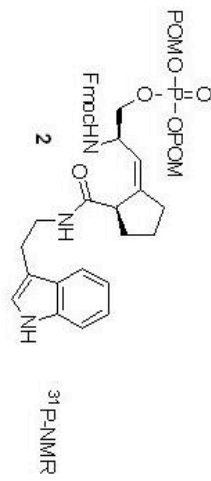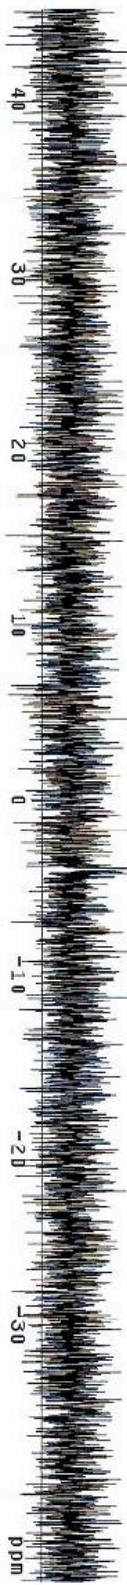

Data File: c:\star\data\zs-iv-89-2002.rnm  
 Sample ID: zs-IV-89-2  
 Operator (Inj): Operator  
 Injection Date: 04/20/2006 08:26:17  
 Injection Method: c:\star\song zhaol\0-90 for  
 Peak Measurement:  
 Calculation Type: Percent

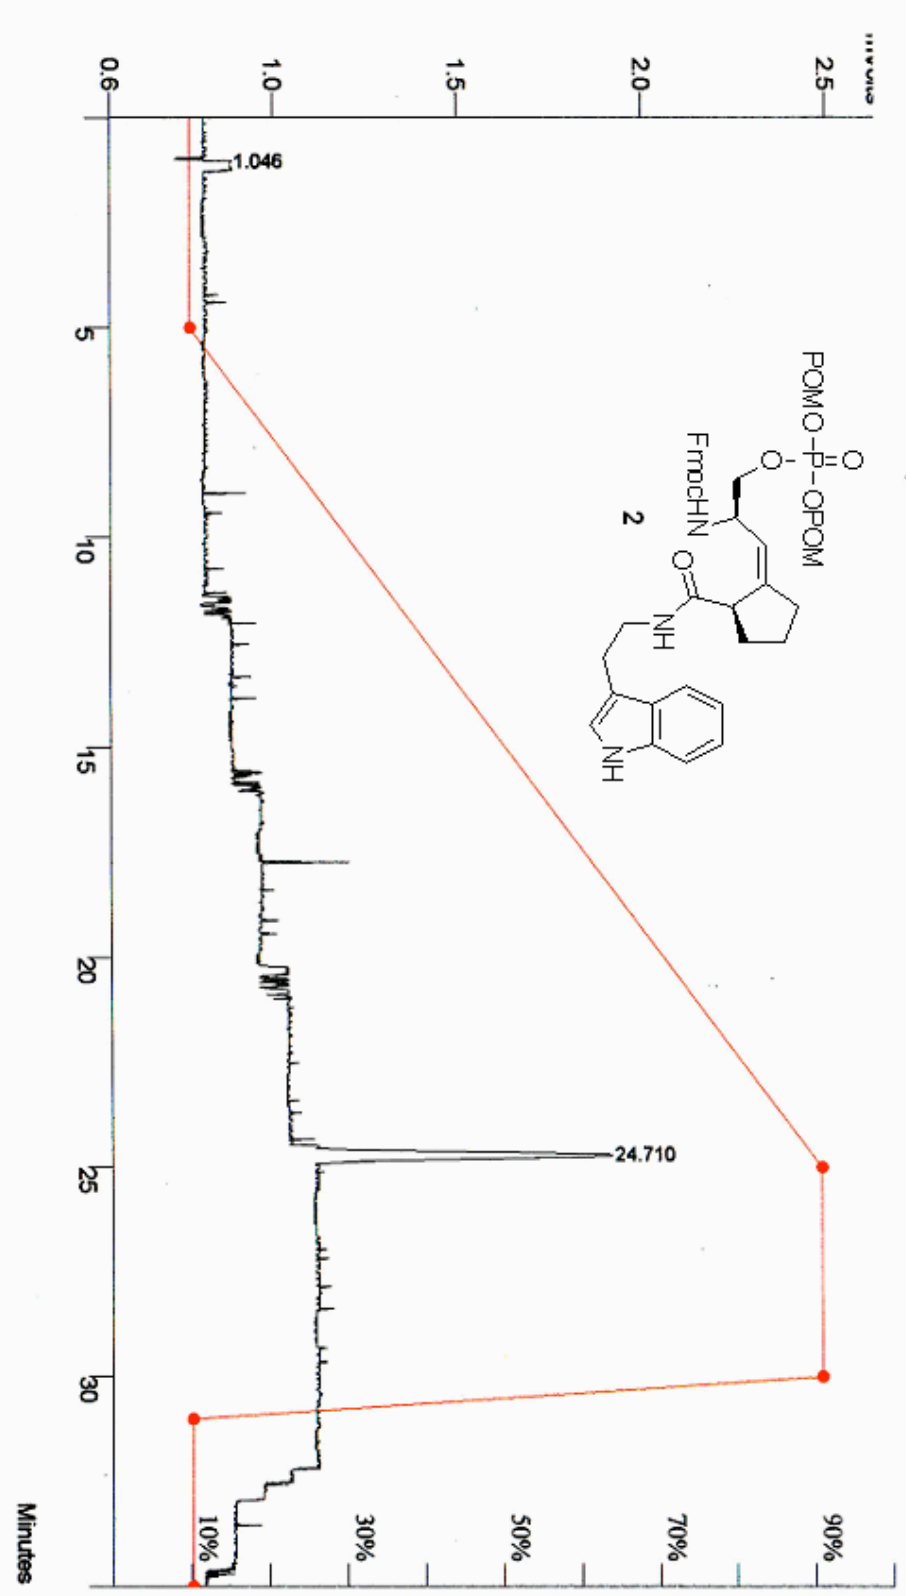

Supplement: NIHMS34431-supplement-01.pdf [file NIHMS34431-supplement-01.pdf]
